# Supplementary material
Source: PubMed Central journal article supplement (PMC3755358)
Supplement: NIHMS347823-supplement-1.pdf [file NIHMS347823-supplement-1.pdf]

# Supplemental Figure 1

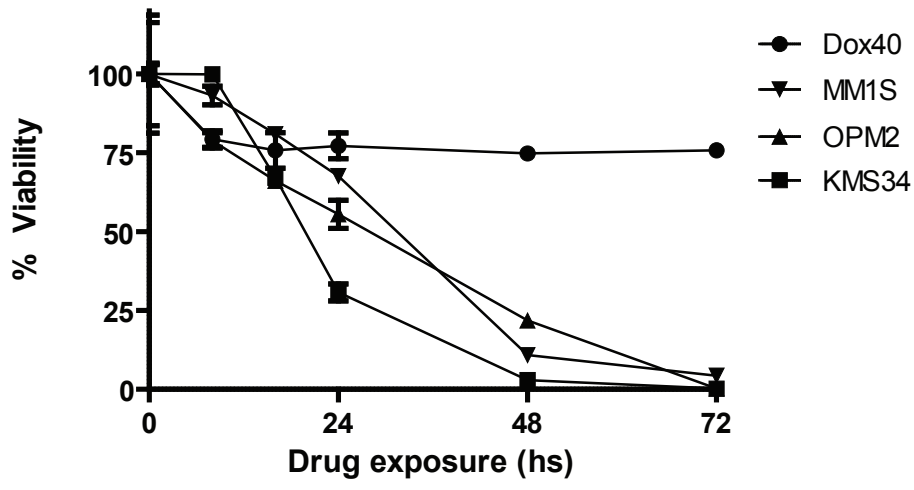

# Supplemental Figure 2

A

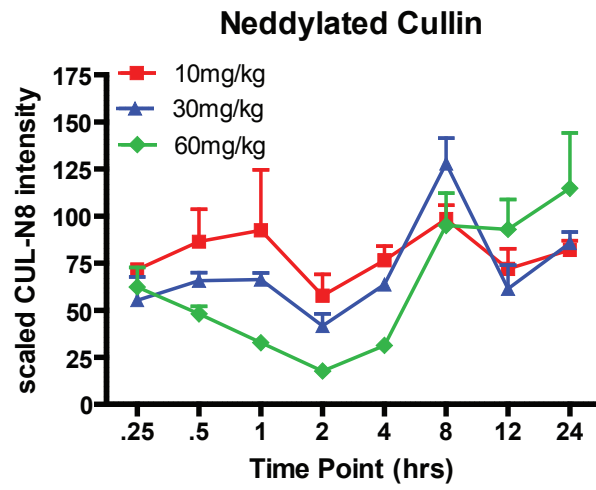

B

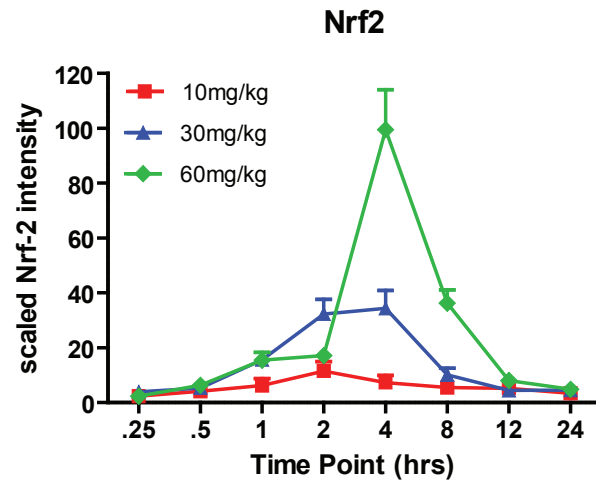

C

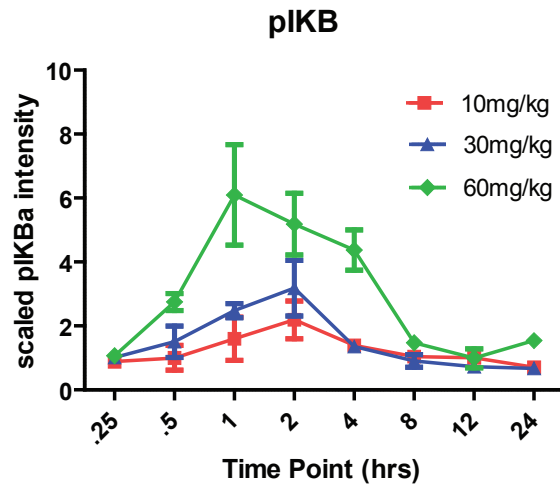

# Supplemental Figure 3

**A**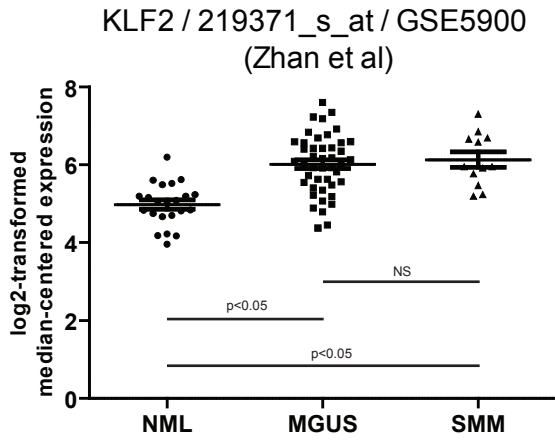**B**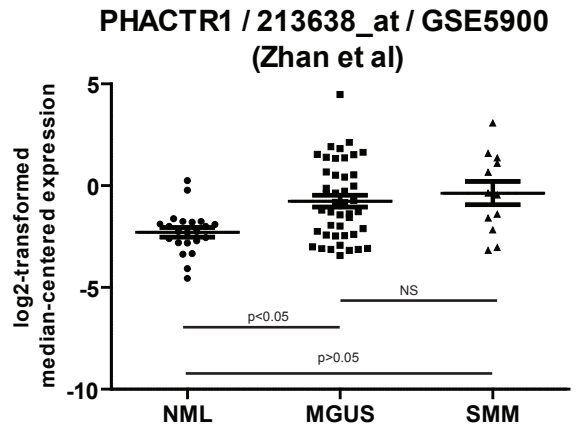**C**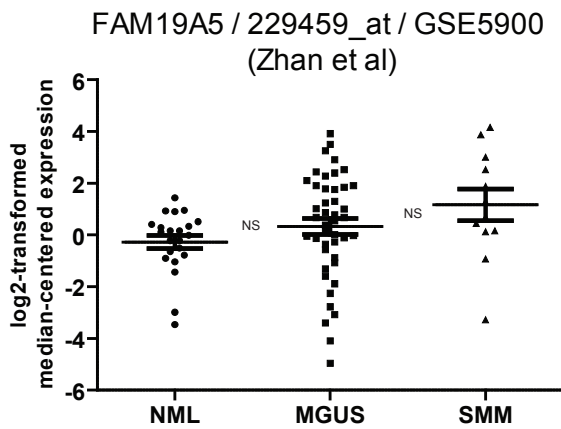**D**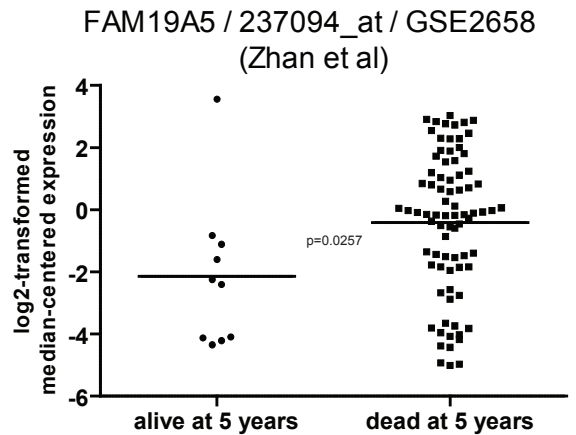**E**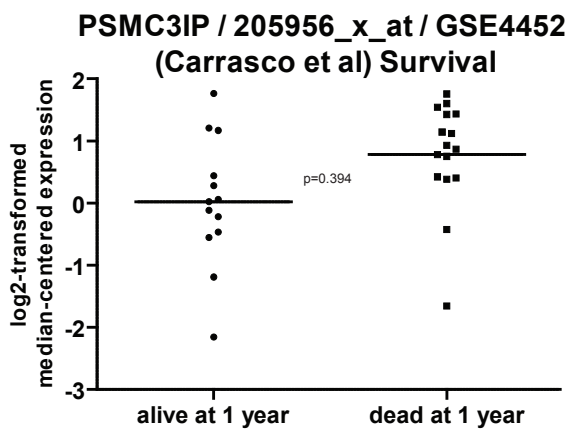**F**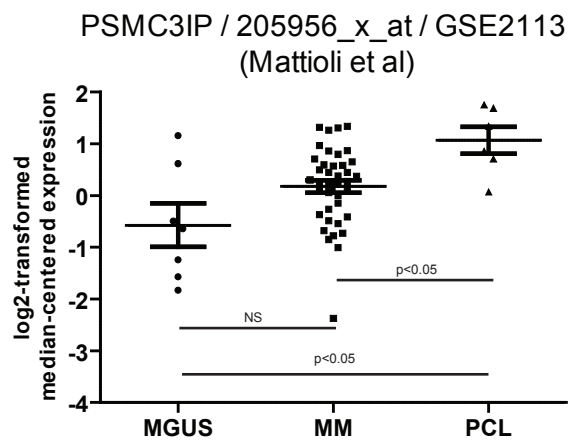

## Supplemental Figure Legends

**Supplemental Figure 1. Cell death commitment assays of MLN4924 treatment.** Dox40, MM.1S, OPM2 and KMS34 cells were exposed to MLN4924 (500nM) for up to 72hrs, followed by drug washout and incubation in drug-free medium for an additional 72hrs. MLN4924 treatment for 48hrs resulted in commitment to death in KMS34, OPM2 and MM.1S cells, suggesting that molecular events initiating cell death can occur as early as <48hrs of MLN4924 treatment. Dox40 cells remained insensitive to MLN4924 killing when exposed up to 72hrs.

**Supplemental Figure 2. Tumor levels of neddylated cullin, Nrf2 and pIKB in mice treated with MLN4924.** Mice injected subcutaneously with  $2 \times 10^7$  RPMI8226/S cell were treated with a single dose of 10, 30 or 60 mg/kg MLN4924. Levels of neddylated cullins (A), Nrf2 (B) and pIKB (C) were measured in tumor samples at time points up to 24hrs (N=3 per group).

**Supplemental Figure 3. Biological and clinical relevance of distinct transcripts down-regulated by MLN4924.** Gene expression profiling was performed on treated MM1S cells (250nM) at 8, 16 and 24hrs. In publically available GEO datasets, we evaluated the association of transcripts suppressed by MLN4924 with clinical outcome and expression in various stages of plasma cell dyscrasias. Panels A-F show examples of these associations, namely the higher level expression of the transcripts KLF2 (A), PHACTR1 (B), or FAM1985 (C) in smoldering myeloma or MGUS compared to normal plasma cells; the higher expression of FAM1985 in myeloma patients who have died within 5 years of study entry vs. those alive at 5 years (D); the higher level of expression of PSMCI3P in patients who have died within 1 year of diagnosis vs. alive after 1 year of diagnosis (E); as well as higher level expression of PSMCI3P in PCL vs. MM vs. MGUS (F).

Supplemental table: gene expression profiling changes triggered by MLN4924 treatment

| probe set    | gene                                                                                                                                                                                                                               | MM1S MLN4924 8H | MM1S MLN4924 16H | MM1S MLN4924 24H |
|--------------|------------------------------------------------------------------------------------------------------------------------------------------------------------------------------------------------------------------------------------|-----------------|------------------|------------------|
| 1053_at      | RFC2: replication factor C (activator 1) 2, 40kDa                                                                                                                                                                                  | -1.18           | -1.78            | -2.16            |
| 1405_i_at    | CCL5: chemokine (C-C motif) ligand 5                                                                                                                                                                                               | -1.41           | -2.01            | -1.85            |
| 1552409_a_at | ODF4: outer dense fiber of sperm tails 4                                                                                                                                                                                           | 2.08            | 2.07             | 2.07             |
| 1553856_s_at | P2RY10: purinergic receptor P2Y, G-protein coupled, 10                                                                                                                                                                             | 1.9             | 2.6              | 2.76             |
| 1553989_a_at | ATP6V1C2: ATPase, H <sup>+</sup> transporting, lysosomal 42kDa, V1 subunit C2                                                                                                                                                      | -1.57           | -1.82            | -1.94            |
| 1554343_a_at | BRDG1: BCR downstream signaling 1                                                                                                                                                                                                  | -1.07           | 1.75             | 1.69             |
| 1554438_at   | KIAA1217: KIAA1217                                                                                                                                                                                                                 | -1.22           | 1.88             | 1.67             |
| 1554572_a_at | SUV39H2: suppressor of variegation 3-9 homolog 2 (Drosophila)                                                                                                                                                                      | -1.11           | -1.53            | -1.56            |
| 1554696_s_at | TYMS: thymidylate synthetase                                                                                                                                                                                                       | -1.05           | -1.51            | -1.73            |
| 1555083_at   | MGC34774: ribosomal protein L13A-like                                                                                                                                                                                              | 1.31            | 2.07             | 1.85             |
| 1555561_a_at | UGCGL2: UDP-glucose ceramide glucosyltransferase-like 2                                                                                                                                                                            | -1.4            | -1.97            | -1.73            |
| 1555618_s_at | SAE1: SUMO-1 activating enzyme subunit 1                                                                                                                                                                                           | -1.06           | -1.56            | -1.51            |
| 1555759_a_at | CCL5: chemokine (C-C motif) ligand 5                                                                                                                                                                                               | -1.39           | -1.64            | -1.69            |
| 1555772_a_at | CDC25A: cell division cycle 25A                                                                                                                                                                                                    | -1.25           | -2.15            | -2.14            |
| 1555851_s_at | SEPW1: selenoprotein W, 1                                                                                                                                                                                                          | -1.17           | -1.52            | -1.56            |
| 1556095_at   | UNC13C: unc-13 homolog C (C. elegans)                                                                                                                                                                                              | -1.73           | -1.77            | -1.91            |
| 1556096_s_at | UNC13C: unc-13 homolog C (C. elegans)                                                                                                                                                                                              | -1.6            | -1.51            | -1.69            |
| 1556121_at   | NAP1L1: Nucleosome assembly protein 1-like 1                                                                                                                                                                                       | -1.15           | -1.72            | -1.66            |
| 1556347_at   | RP11-19J3.3: Hypothetical protein MGC88047                                                                                                                                                                                         | 1.09            | -2.1             | -1.55            |
| 1556643_at   | LOC93343: Hypothetical protein BC011840                                                                                                                                                                                            | -1.09           | 1.59             | 1.59             |
| 1556821_x_at | DLEU2: deleted in lymphocytic leukemia, 2                                                                                                                                                                                          | -1.23           | -2.27            | -1.78            |
| 1557128_at   | FAM111B: family with sequence similarity 111, member B                                                                                                                                                                             | -1.2            | -2.25            | -1.76            |
| 1557129_a_at | FAM111B: family with sequence similarity 111, member B                                                                                                                                                                             | -1.11           | -2.46            | -1.71            |
| 1557267_s_at | LOC284952: hypothetical protein LOC284952                                                                                                                                                                                          | -1.51           | -2.44            | -1.63            |
| 1557383_a_at | CDNA FLJ38112 fis, clone D3OST2002272                                                                                                                                                                                              | 1.18            | 1.92             | 2.26             |
| 1558292_s_at | PIGW: phosphatidylinositol glycan anchor biosynthesis, class W                                                                                                                                                                     | -1.3            | -1.85            | -1.89            |
| 1559584_a_at | C16orf54 /// LOC653141: chromosome 16 open reading frame 54 /// similar to chromosome 16 open reading frame 54                                                                                                                     | -1.26           | 1.72             | 1.84             |
| 1559675_at   | gb:BC033513.1 /DB_XREF=gi:23273194 /TID=Hs2.208347.1 /CNT=5 /FEA=mRNA /TIER=ConsEnd /STK=0 /UG=Hs.208347 /UG_TITLE=Homo sapiens, clone IMAGE:5172161, mRNA, partial cds /DEF=Homo sapiens, clone IMAGE:5172161, mRNA, partial cds. | 4.46            | 6.11             | 3.55             |
| 1561690_at   | SSBP2: Single-stranded DNA binding protein 2                                                                                                                                                                                       | -1.64           | -2.21            | -1.24            |
| 1563209_a_at | C20orf133: chromosome 20 open reading frame 133                                                                                                                                                                                    | 1.06            | 1.93             | 2.56             |
| 1564064_a_at | ATP11B: ATPase, Class VI, type 11B                                                                                                                                                                                                 | 1.12            | 1.54             | 1.54             |
| 1566989_at   | ARID1B: AT rich interactive domain 1B (SWI1-like)                                                                                                                                                                                  | 1.31            | 1.68             | 1.83             |

|              |                                                                                           |       |       |       |
|--------------|-------------------------------------------------------------------------------------------|-------|-------|-------|
| 1566990_x_at | ARID1B: AT rich interactive domain 1B (SWI1-like)                                         | 1.36  | 1.6   | 1.81  |
| 1567081_x_at | CLN6: ceroid-lipofuscinosis, neuronal 6, late infantile, variant                          | -1.12 | -1.58 | -1.53 |
| 1568592_at   | RNF36: ring finger protein 36                                                             | -1.01 | 1.82  | 1.64  |
| 1569345_at   | P2RX1: Purinergic receptor P2X, ligand-gated ion channel, 1                               | 1.15  | 1.65  | 1.76  |
| 1569346_a_at | P2RX1: Purinergic receptor P2X, ligand-gated ion channel, 1                               | -1.05 | 1.64  | 1.82  |
| 1569969_a_at | UNC13C: unc-13 homolog C (C. elegans)                                                     | -1.64 | -1.76 | -1.93 |
| 200664_s_at  | DNAJB1: DnaJ (Hsp40) homolog, subfamily B, member 1                                       | 1.18  | -1.8  | -1.6  |
| 200666_s_at  | DNAJB1: DnaJ (Hsp40) homolog, subfamily B, member 1                                       | 1.19  | -1.78 | -1.66 |
| 200715_x_at  | RPL13A: ribosomal protein L13a                                                            | 1.22  | 1.73  | 1.82  |
| 200748_s_at  | FTH1: ferritin, heavy polypeptide 1                                                       | 1.53  | 1.74  | 1.4   |
| 200762_at    | DPYSL2: dihydropyrimidinase-like 2                                                        | -1.41 | -1.69 | -1.68 |
| 200799_at    | HSPA1A: heat shock 70kDa protein 1A                                                       | 1.58  | -1.89 | -2.05 |
| 200800_s_at  | HSPA1A /// HSPA1B: heat shock 70kDa protein 1A /// heat shock 70kDa protein 1B            | 1.51  | -2.4  | -1.58 |
| 200862_at    | DHCR24: 24-dehydrocholesterol reductase                                                   | 1.43  | -1.52 | -1.72 |
| 200878_at    | EPAS1: endothelial PAS domain protein 1                                                   | 1.78  | 2.3   | 2.13  |
| 200920_s_at  | BTG1: B-cell translocation gene 1, anti-proliferative                                     | -1.09 | 1.53  | 1.84  |
| 200951_s_at  | CCND2: cyclin D2                                                                          | -1.78 | -1.74 | -1.72 |
| 200952_s_at  | CCND2: cyclin D2                                                                          | -2.13 | -1.73 | -1.73 |
| 200953_s_at  | CCND2: cyclin D2                                                                          | -1.58 | -1.59 | -1.6  |
| 201026_at    | EIF5B: eukaryotic translation initiation factor 5B                                        | 3.66  | 1.9   | 3.15  |
| 201266_at    | TXNRD1: thioredoxin reductase 1                                                           | 2.77  | 2.12  | 2.06  |
| 201324_at    | EMP1: epithelial membrane protein 1                                                       | 1.4   | 2.08  | 2.23  |
| 201384_s_at  | NBR1 /// LOC653347: neighbor of BRCA1 gene 1 /// similar to neighbor of BRCA1 gene 1      | -1.02 | 1.86  | 1.77  |
| 201412_at    | LRP10: low density lipoprotein receptor-related protein 10                                | 1.18  | 1.73  | 1.9   |
| 201417_at    | SOX4: SRY (sex determining region Y)-box 4                                                | -1.63 | -1.49 | -1.65 |
| 201427_s_at  | SEPP1: selenoprotein P, plasma, 1                                                         | 1.03  | 2.48  | 2.29  |
| 201467_s_at  | NQO1: NAD(P)H dehydrogenase, quinone 1                                                    | 3.05  | 3.57  | 3.07  |
| 201468_s_at  | NQO1: NAD(P)H dehydrogenase, quinone 1                                                    | 4.14  | 3.37  | 2.95  |
| 201494_at    | PRCP: prolylcarboxypeptidase (angiotensinase C)                                           | 1.08  | 1.54  | 1.61  |
| 201555_at    | MCM3: MCM3 minichromosome maintenance deficient 3 (S. cerevisiae)                         | -1.09 | -1.73 | -2    |
| 201579_at    | FAT: FAT tumor suppressor homolog 1 (Drosophila)                                          | -1.06 | 1.61  | 1.8   |
| 201667_at    | GJA1: gap junction protein, alpha 1, 43kDa (connexin 43)                                  | -1.15 | -1.54 | -1.75 |
| 201755_at    | MCM5: MCM5 minichromosome maintenance deficient 5, cell division cycle 46 (S. cerevisiae) | -1.14 | -2.14 | -2.34 |
| 201818_at    | AYTL2: acyltransferase like 2                                                             | -1.28 | -1.56 | -1.69 |

|             |                                                                                                                                         |       |       |       |
|-------------|-----------------------------------------------------------------------------------------------------------------------------------------|-------|-------|-------|
| 201862_s_at | LRRFIP1: leucine rich repeat (in FLII) interacting protein 1                                                                            | -1.55 | -1.58 | -1.36 |
| 201930_at   | MCM6: MCM6 minichromosome maintenance deficient 6 (MIS5 homolog, <i>S. pombe</i> ) ( <i>S. cerevisiae</i> )                             | -1.18 | -1.82 | -2.06 |
| 201939_at   | PLK2: polo-like kinase 2 ( <i>Drosophila</i> )                                                                                          | 1.04  | 1.93  | 1.87  |
| 201969_at   | NASP: nuclear autoantigenic sperm protein (histone-binding)                                                                             | -1.18 | -1.93 | -2.02 |
| 201970_s_at | NASP: nuclear autoantigenic sperm protein (histone-binding)                                                                             | -1.25 | -1.87 | -1.95 |
| 202085_at   | TJP2: tight junction protein 2 (zona occludens 2)                                                                                       | -2.05 | -2.4  | -2.56 |
| 202105_at   | IGBP1: immunoglobulin (CD79A) binding protein 1                                                                                         | 1.11  | 1.65  | 1.78  |
| 202107_s_at | MCM2: MCM2 minichromosome maintenance deficient 2, mitotin ( <i>S. cerevisiae</i> )                                                     | -1.12 | -1.98 | -2.08 |
| 202119_s_at | CPNE3: copine III                                                                                                                       | 1.15  | 1.59  | 1.59  |
| 202188_at   | NUP93: nucleoporin 93kDa                                                                                                                | -1.16 | -1.66 | -1.51 |
| 202241_at   | TRIB1: tribbles homolog 1 ( <i>Drosophila</i> )                                                                                         | 1.11  | 1.71  | 1.69  |
| 202284_s_at | CDKN1A: cyclin-dependent kinase inhibitor 1A (p21, Cip1)                                                                                | -1.21 | -1.59 | -2.07 |
| 202308_at   | SREBF1: sterol regulatory element binding transcription factor 1                                                                        | -1.24 | -1.53 | -1.52 |
| 202336_s_at | PAM: peptidylglycine alpha-amidating monooxygenase                                                                                      | 1.25  | 1.64  | 1.65  |
| 202364_at   | MXI1: MAX interactor 1 /// MAX interactor 1                                                                                             | 1.47  | 1.75  | 1.59  |
| 202412_s_at | USP1: ubiquitin specific peptidase 1                                                                                                    | -1.31 | -1.72 | -1.62 |
| 202430_s_at | PLSCR1: phospholipid scramblase 1                                                                                                       | -1.42 | -1.51 | -1.54 |
| 202478_at   | TRIB2: tribbles homolog 2 ( <i>Drosophila</i> )                                                                                         | 1.26  | 1.67  | 1.51  |
| 202479_s_at | TRIB2: tribbles homolog 2 ( <i>Drosophila</i> )                                                                                         | 1.2   | 1.91  | 1.62  |
| 202533_s_at | DHFR /// LOC643509 /// LOC653874: dihydrofolate reductase /// similar to Dihydrofolate reductase /// similar to Dihydrofolate reductase | -1.05 | -1.72 | -1.84 |
| 202551_s_at | CRIM1: cysteine rich transmembrane BMP regulator 1 (chordin-like)                                                                       | 1.45  | 1.66  | 1.6   |
| 202581_at   | HSPA1B: heat shock 70kDa protein 1B                                                                                                     | 1.26  | -2.23 | -1.51 |
| 202636_at   | RNF103: ring finger protein 103                                                                                                         | 1.11  | 1.6   | 1.6   |
| 202730_s_at | PDCD4: programmed cell death 4 (neoplastic transformation inhibitor)                                                                    | 1.21  | 2.12  | 2.02  |
| 202731_at   | PDCD4: programmed cell death 4 (neoplastic transformation inhibitor)                                                                    | 1.1   | 2.03  | 2.01  |
| 202769_at   | CCNG2: cyclin G2                                                                                                                        | 1.18  | 2.22  | 2.17  |
| 202770_s_at | CCNG2: cyclin G2                                                                                                                        | 1.15  | 2.2   | 2.17  |
| 202869_at   | OAS1: 2',5'-oligoadenylate synthetase 1, 40/46kDa                                                                                       | -1.03 | 1.67  | 2.01  |
| 202903_at   | LSM5: LSM5 homolog, U6 small nuclear RNA associated ( <i>S. cerevisiae</i> )                                                            | -1.16 | -1.68 | -1.77 |
| 202904_s_at | LSM5: LSM5 homolog, U6 small nuclear RNA associated ( <i>S. cerevisiae</i> )                                                            | -1.14 | -1.55 | -1.87 |
| 202971_s_at | DYRK2: dual-specificity tyrosine-(Y)-phosphorylation regulated kinase 2                                                                 | -1.48 | -1.73 | -2.1  |

|             |                                                                                                        |       |       |       |
|-------------|--------------------------------------------------------------------------------------------------------|-------|-------|-------|
| 202988_s_at | RGS1: regulator of G-protein signalling 1                                                              | -1.11 | 2.63  | 3.43  |
| 203209_at   | RFC5: replication factor C (activator 1) 5, 36.5kDa                                                    | -1.09 | -1.64 | -1.92 |
| 203226_s_at | TSPAN31: tetraspanin 31                                                                                | -1.06 | 1.59  | 1.8   |
| 203286_at   | RNF44: ring finger protein 44                                                                          | 1.65  | 2.22  | 2     |
| 203394_s_at | HES1: hairy and enhancer of split 1, (Drosophila)                                                      | -2.4  | -2.07 | -2.43 |
| 203395_s_at | HES1: hairy and enhancer of split 1, (Drosophila)                                                      | -3.39 | -2.29 | -2.35 |
| 203404_at   | ARMCX2: armadillo repeat containing, X-linked 2                                                        | -1.06 | 1.76  | 1.52  |
| 203408_s_at | SATB1: special AT-rich sequence binding protein 1 (binds to nuclear matrix/scaffold-associating DNA's) | -1.39 | 1.95  | 2.26  |
| 203476_at   | TPBG: trophoblast glycoprotein                                                                         | 1.34  | 2.74  | 2.73  |
| 203658_at   | SLC25A20: solute carrier family 25 (carnitine/acylcarnitine translocase), member 20                    | -1.02 | 1.55  | 1.63  |
| 203685_at   | BCL2: B-cell CLL/lymphoma 2                                                                            | -1.06 | 1.54  | 1.57  |
| 203705_s_at | FZD7: frizzled homolog 7 (Drosophila)                                                                  | 1.31  | 2.23  | 2.57  |
| 203706_s_at | FZD7: frizzled homolog 7 (Drosophila)                                                                  | 1.62  | 3.17  | 3.19  |
| 203708_at   | PDE4B: phosphodiesterase 4B, cAMP-specific (phosphodiesterase E4 dunce homolog, Drosophila)            | 1.31  | 2.23  | 2.77  |
| 203729_at   | EMP3: epithelial membrane protein 3                                                                    | 1.06  | 1.75  | 1.74  |
| 203733_at   | DEXI: dexamethasone-induced transcript                                                                 | 1.2   | 1.73  | 1.58  |
| 203810_at   | DNAJB4: DnaJ (Hsp40) homolog, subfamily B, member 4                                                    | 1.71  | 1.29  | 1.57  |
| 203836_s_at | MAP3K5: mitogen-activated protein kinase kinase kinase 5                                               | -2.04 | -1.71 | -1.59 |
| 203837_at   | MAP3K5: mitogen-activated protein kinase kinase kinase 5                                               | -2.02 | -1.95 | -1.52 |
| 203853_s_at | GAB2: GRB2-associated binding protein 2                                                                | 1.24  | 1.73  | 1.54  |
| 203904_x_at | CD82: CD82 molecule                                                                                    | -1.55 | -1.48 | -1.54 |
| 203917_at   | CXADR: coxsackie virus and adenovirus receptor                                                         | -1.22 | -1.67 | -1.78 |
| 203925_at   | GCLM: glutamate-cysteine ligase, modifier subunit                                                      | 2.84  | 1.59  | 1.33  |
| 203935_at   | ACVR1: activin A receptor, type I                                                                      | 1.16  | 1.56  | 1.64  |
| 203939_at   | NT5E: 5'-nucleotidase, ecto (CD73)                                                                     | 1.16  | 2.49  | 2.86  |
| 203964_at   | NMI: N-myc (and STAT) interactor                                                                       | -2.14 | -1.68 | -1.39 |
| 203967_at   | CDC6: CDC6 cell division cycle 6 homolog (S. cerevisiae)                                               | -1.1  | -1.87 | -1.99 |
| 203968_s_at | CDC6: CDC6 cell division cycle 6 homolog (S. cerevisiae)                                               | -1.2  | -2.26 | -2.12 |
| 204033_at   | TRIP13: thyroid hormone receptor interactor 13                                                         | -1.26 | -1.66 | -1.73 |
| 204045_at   | TCEAL1: transcription elongation factor A (SII)-like 1                                                 | 1.2   | 1.68  | 1.85  |
| 204059_s_at | ME1: malic enzyme 1, NADP(+)-dependent, cytosolic                                                      | 1.61  | 1.48  | 1.6   |
| 204084_s_at | CLN5: ceroid-lipofuscinosis, neuronal 5                                                                | 1.29  | 1.64  | 1.63  |
| 204103_at   | CCL4: chemokine (C-C motif) ligand 4                                                                   | -1.58 | 1.34  | 1.9   |
| 204126_s_at | CDC45L: CDC45 cell division cycle 45-like (S. cerevisiae)                                              | -1.02 | -1.62 | -2    |
| 204127_at   | RFC3: replication factor C (activator 1) 3, 38kDa                                                      | -1.07 | -1.63 | -1.74 |



|             |                                                                                                                                |       |       |       |
|-------------|--------------------------------------------------------------------------------------------------------------------------------|-------|-------|-------|
| 204128_s_at | RFC3: replication factor C (activator 1) 3, 38kDa                                                                              | -1.14 | -1.76 | -2.03 |
| 204142_at   | ENOSF1: enolase superfamily member 1                                                                                           | -1.45 | -1.88 | -1.76 |
| 204143_s_at | ENOSF1: enolase superfamily member 1                                                                                           | -1.36 | -1.71 | -1.71 |
| 204146_at   | RAD51AP1: RAD51 associated protein 1                                                                                           | -1.1  | -1.78 | -1.65 |
| 204151_x_at | AKR1C1: aldo-keto reductase family 1, member C1 (dihydrodiol dehydrogenase 1; 20-alpha (3-alpha)-hydroxysteroid dehydrogenase) | 1.7   | 2.76  | 2.67  |
| 204195_s_at | PKNOX1: PBX/knotted 1 homeobox 1                                                                                               | -1.24 | -1.51 | -1.55 |
| 204200_s_at | PDGFB: platelet-derived growth factor beta polypeptide (simian sarcoma viral (v-sis) oncogene homolog)                         | 1.2   | 1.73  | 1.68  |
| 204285_s_at | PMAIP1: phorbol-12-myristate-13-acetate-induced protein 1                                                                      | -1.35 | -2    | -2.34 |
| 204286_s_at | PMAIP1: phorbol-12-myristate-13-acetate-induced protein 1                                                                      | -1.29 | -2.12 | -2.26 |
| 204418_x_at | GSTM2: glutathione S-transferase M2 (muscle)                                                                                   | 1.28  | 1.7   | 1.71  |
| 204432_at   | SOX12: SRY (sex determining region Y)-box 12                                                                                   | 1.68  | 1.74  | 1.65  |
| 204531_s_at | BRCA1: breast cancer 1, early onset                                                                                            | -1.1  | -1.7  | -1.74 |
| 204550_x_at | GSTM1: glutathione S-transferase M1                                                                                            | 1.29  | 1.72  | 1.56  |
| 204655_at   | CCL5: chemokine (C-C motif) ligand 5 /// chemokine (C-C motif) ligand 5                                                        | -1.42 | -2.14 | -1.98 |
| 204686_at   | IRS1: insulin receptor substrate 1                                                                                             | 1.1   | 1.51  | 1.67  |
| 204695_at   | CDC25A: cell division cycle 25A                                                                                                | -1.01 | -1.6  | -1.72 |
| 204698_at   | ISG20: interferon stimulated exonuclease gene 20kDa                                                                            | -1.53 | -1.65 | -1.17 |
| 204734_at   | KRT15: keratin 15                                                                                                              | 1.74  | 1.78  | 2.08  |
| 204768_s_at | FEN1: flap structure-specific endonuclease 1                                                                                   | -1.08 | -1.56 | -1.89 |
| 204775_at   | CHAF1B: chromatin assembly factor 1, subunit B (p60)                                                                           | -1.11 | -1.54 | -1.79 |
| 204798_at   | MYB: v-myb myeloblastosis viral oncogene homolog (avian)                                                                       | 1.03  | -1.71 | -1.79 |
| 204805_s_at | H1FX: H1 histone family, member X                                                                                              | -2.27 | -1.54 | -1.61 |
| 204820_s_at | BTN3A3 /// BTN3A2: butyrophilin, subfamily 3, member A3 /// butyrophilin, subfamily 3, member A2                               | -1.02 | 1.57  | 1.52  |
| 204840_s_at | EEA1: early endosome antigen 1, 162kD                                                                                          | -1.41 | -2.66 | -1.6  |
| 204894_s_at | AOC3: amine oxidase, copper containing 3 (vascular adhesion protein 1)                                                         | 1.03  | 1.74  | 1.52  |
| 204976_s_at | AMMECR1: Alport syndrome, mental retardation, midface hypoplasia and elliptocytosis chromosomal region, gene 1                 | -1.29 | -1.69 | -1.55 |
| 204979_s_at | SH3BGR: SH3 domain binding glutamic acid-rich protein                                                                          | 1.04  | 1.58  | 1.66  |
| 204992_s_at | PFN2: profilin 2                                                                                                               | -1.44 | -1.62 | -1.77 |
| 205024_s_at | RAD51: RAD51 homolog (RecA homolog, E. coli) (S. cerevisiae)                                                                   | -1.2  | -2.08 | -2.39 |
| 205073_at   | CYP2J2: cytochrome P450, family 2, subfamily J, polypeptide 2                                                                  | 1.22  | 1.62  | 1.65  |
| 205085_at   | ORC1L: origin recognition complex, subunit 1-like (yeast)                                                                      | 1.06  | -1.67 | -1.85 |

|             |                                                                                                                                                                                                                                                                                                                                                                                                                                                             |       |       |       |
|-------------|-------------------------------------------------------------------------------------------------------------------------------------------------------------------------------------------------------------------------------------------------------------------------------------------------------------------------------------------------------------------------------------------------------------------------------------------------------------|-------|-------|-------|
| 205235_s_at | MPHOSPH1: M-phase phosphoprotein 1                                                                                                                                                                                                                                                                                                                                                                                                                          | -1.19 | -3.05 | -1.63 |
| 205257_s_at | AMPH: amphiphysin (Stiff-Man syndrome with breast cancer 128kDa autoantigen)                                                                                                                                                                                                                                                                                                                                                                                | -1.22 | -1.81 | -1.64 |
| 205281_s_at | PIGA: phosphatidylinositol glycan anchor biosynthesis, class A (paroxysmal nocturnal hemoglobinuria) /// phosphatidylinositol glycan anchor biosynthesis, class A (paroxysmal nocturnal hemoglobinuria)                                                                                                                                                                                                                                                     | -1.13 | -1.52 | -1.66 |
| 205296_at   | gb:AL365505 /DB_XREF=gi:11558572 /FEA=FLmRNA /CNT=36 /TID=Hs.87.0 /TIER=ConsEnd /STK=4 /UG=Hs.87 /LL=5933 /UG_GENE=RBL1 /UG_TITLE=retinoblastoma-like 1 (p107) /DEF=Human DNA sequence from clone RP11-382A12 on chromosome 20 Contains ESTs, STSs, GSSs and CpG islands. Contains the 5 part of the gene for a 72.1 KDa protein (DKFZP564A032, SBB188) similar to mouse IFN-gamma induced MG11 and the 3 part of the RBL... /FL=gb:L14812.1 gb:NM_002895.1 | -1.17 | -1.72 | -1.57 |
| 205352_at   | SERPINI1: serpin peptidase inhibitor, clade I (neuroserpin), member 1                                                                                                                                                                                                                                                                                                                                                                                       | 1     | 1.95  | 2.44  |
| 205393_s_at | CHEK1: CHK1 checkpoint homolog (S. pombe)                                                                                                                                                                                                                                                                                                                                                                                                                   | 1.01  | -1.66 | -1.86 |
| 205436_s_at | H2AFX: H2A histone family, member X                                                                                                                                                                                                                                                                                                                                                                                                                         | -1.28 | -1.57 | -1.73 |
| 205519_at   | WDR76: WD repeat domain 76                                                                                                                                                                                                                                                                                                                                                                                                                                  | 1.04  | -1.68 | -1.91 |
| 205544_s_at | CR2: complement component (3d/Epstein Barr virus) receptor 2                                                                                                                                                                                                                                                                                                                                                                                                | -1.26 | -1.76 | -1.9  |
| 205552_s_at | OAS1: 2',5'-oligoadenylate synthetase 1, 40/46kDa                                                                                                                                                                                                                                                                                                                                                                                                           | -1.18 | 1.94  | 2.37  |
| 205632_s_at | PIP5K1B: phosphatidylinositol-4-phosphate 5-kinase, type I, beta                                                                                                                                                                                                                                                                                                                                                                                            | 1.14  | 1.51  | 1.54  |
| 205677_s_at | DLEU1 /// SPANXC: deleted in lymphocytic leukemia, 1 /// SPANX family, member C                                                                                                                                                                                                                                                                                                                                                                             | 1.55  | 1.54  | 1.35  |
| 205733_at   | BLM: Bloom syndrome                                                                                                                                                                                                                                                                                                                                                                                                                                         | -1.02 | -1.74 | -1.74 |
| 205770_at   | GSR: glutathione reductase                                                                                                                                                                                                                                                                                                                                                                                                                                  | 2.89  | 1.76  | 1.73  |
| 205909_at   | POLE2: polymerase (DNA directed), epsilon 2 (p59 subunit)                                                                                                                                                                                                                                                                                                                                                                                                   | -1.16 | -1.84 | -2    |
| 205943_at   | TDO2: tryptophan 2,3-dioxygenase                                                                                                                                                                                                                                                                                                                                                                                                                            | 1.18  | 1.77  | 2.22  |
| 205956_x_at | PSMC3IP: PSMC3 interacting protein                                                                                                                                                                                                                                                                                                                                                                                                                          | -1.38 | -1.76 | -1.84 |
| 206003_at   | CEP135: centrosomal protein 135kDa                                                                                                                                                                                                                                                                                                                                                                                                                          | -1.3  | -1.8  | -1.58 |
| 206118_at   | STAT4: signal transducer and activator of transcription 4                                                                                                                                                                                                                                                                                                                                                                                                   | -1.01 | 1.94  | 1.85  |
| 206121_at   | AMPD1: adenosine monophosphate deaminase 1 (isoform M)                                                                                                                                                                                                                                                                                                                                                                                                      | -1.09 | 2.17  | 2.63  |
| 206185_at   | CRYBB1: crystallin, beta B1                                                                                                                                                                                                                                                                                                                                                                                                                                 | -1.37 | -2.98 | -3.83 |
| 206301_at   | TEC: tec protein tyrosine kinase                                                                                                                                                                                                                                                                                                                                                                                                                            | 1.2   | 1.51  | 1.52  |
| 206316_s_at | KNTC1: kinetochore associated 1                                                                                                                                                                                                                                                                                                                                                                                                                             | -1.15 | -1.59 | -1.51 |
| 206369_s_at | PIK3CG: phosphoinositide-3-kinase, catalytic, gamma polypeptide                                                                                                                                                                                                                                                                                                                                                                                             | 1.24  | 1.98  | 2.24  |
| 206370_at   | PIK3CG: phosphoinositide-3-kinase, catalytic, gamma polypeptide                                                                                                                                                                                                                                                                                                                                                                                             | 1.21  | 2.01  | 2.27  |

|             |                                                                                                       |       |       |       |
|-------------|-------------------------------------------------------------------------------------------------------|-------|-------|-------|
| 206385_s_at | ANK3: ankyrin 3, node of Ranvier (ankyrin G)                                                          | -2.18 | -2.25 | -1.85 |
| 206414_s_at | DDEF2: development and differentiation enhancing factor 2                                             | -1.53 | -1.6  | -1.63 |
| 206513_at   | AIM2: absent in melanoma 2                                                                            | -1.05 | 1.88  | 1.84  |
| 206698_at   | XK: X-linked Kx blood group (McLeod syndrome)                                                         | -1.5  | -1.6  | -1.62 |
| 206828_at   | TXK: TXK tyrosine kinase                                                                              | -1.02 | 1.56  | 1.92  |
| 206949_s_at | RUSC1: RUN and SH3 domain containing 1                                                                | 1.56  | 1.6   | 1.28  |
| 206978_at   | CCR2: chemokine (C-C motif) receptor 2 /// chemokine (C-C motif) receptor 2                           | -1.58 | 1.75  | 2.26  |
| 207332_s_at | TFRC: transferrin receptor (p90, CD71)                                                                | 1.66  | 1.42  | 1.52  |
| 207485_x_at | BTN3A1: butyrophilin, subfamily 3, member A1                                                          | 1.04  | 1.51  | 1.58  |
| 207543_s_at | P4HA1: procollagen-proline, 2-oxoglutarate 4-dioxygenase (proline 4-hydroxylase), alpha polypeptide I | 1.19  | 1.67  | 1.69  |
| 207655_s_at | BLNK: B-cell linker                                                                                   | 1.13  | 1.58  | 1.68  |
| 207681_at   | CXCR3: chemokine (C-X-C motif) receptor 3                                                             | 1.52  | 2.66  | 3.18  |
| 207734_at   | LAX1: lymphocyte transmembrane adaptor 1                                                              | 1.25  | 1.6   | 1.66  |
| 207826_s_at | ID3: inhibitor of DNA binding 3, dominant negative helix-loop-helix protein                           | -1.55 | -1.8  | -2.14 |
| 208319_s_at | RBM3: RNA binding motif (RNP1, RRM) protein 3                                                         | -1.39 | -2.52 | -1.88 |
| 208373_s_at | P2RY6: pyrimidinergic receptor P2Y, G-protein coupled, 6                                              | 1.3   | 1.71  | 2.12  |
| 208699_x_at | TKT: transketolase (Wernicke-Korsakoff syndrome)                                                      | 1.91  | 1.77  | 1.53  |
| 208700_s_at | TKT: transketolase (Wernicke-Korsakoff syndrome)                                                      | 2     | 1.86  | 1.59  |
| 208763_s_at | TSC22D3: TSC22 domain family, member 3                                                                | -1.08 | 1.51  | 1.52  |
| 208791_at   | CLU: clusterin                                                                                        | 1.14  | 1.58  | 1.71  |
| 208792_s_at | CLU: clusterin                                                                                        | 1.1   | 1.62  | 1.73  |
| 208795_s_at | MCM7: MCM7 minichromosome maintenance deficient 7 ( <i>S. cerevisiae</i> )                            | -1.08 | -1.69 | -1.95 |
| 208891_at   | DUSP6: dual specificity phosphatase 6                                                                 | 1.18  | 1.55  | 1.54  |
| 208893_s_at | DUSP6: dual specificity phosphatase 6                                                                 | 1.15  | 1.58  | 1.54  |
| 208955_at   | DUT: dUTP pyrophosphatase                                                                             | -1.08 | -1.91 | -2.42 |
| 209034_at   | PNRC1: proline-rich nuclear receptor coactivator 1                                                    | 1.13  | 1.78  | 1.81  |
| 209043_at   | PAPSS1: 3'-phosphoadenosine 5'-phosphosulfate synthase 1                                              | 1.33  | 1.62  | 1.59  |
| 209102_s_at | HBP1: HMG-box transcription factor 1                                                                  | 1.19  | 1.99  | 2.28  |
| 209160_at   | AKR1C3: aldo-keto reductase family 1, member C3 (3-alpha hydroxysteroid dehydrogenase, type II)       | 3.2   | 6.14  | 6.17  |
| 209184_s_at | IRS2: insulin receptor substrate 2                                                                    | 1.3   | 1.54  | 1.53  |
| 209276_s_at | GLRX: glutaredoxin (thioltransferase)                                                                 | 1.32  | 1.52  | 1.75  |
| 209360_s_at | RUNX1: runt-related transcription factor 1 (acute myeloid leukemia 1; aml1 oncogene)                  | 1.81  | 1.85  | 1.54  |

|             |                                                                                                                                                          |       |       |       |
|-------------|----------------------------------------------------------------------------------------------------------------------------------------------------------|-------|-------|-------|
| 209398_at   | HIST1H1C: histone 1, H1c                                                                                                                                 | -1.2  | -1.88 | -1.77 |
| 209479_at   | CCDC28A: coiled-coil domain containing 28A                                                                                                               | 1.13  | 1.66  | 1.54  |
| 209530_at   | CACNB3: calcium channel, voltage-dependent, beta 3 subunit                                                                                               | 1.13  | 1.79  | 1.73  |
| 209538_at   | ZNF32: zinc finger protein 32                                                                                                                            | 1.26  | 1.73  | 1.76  |
| 209541_at   | IGF1: insulin-like growth factor 1 (somatomedin C)                                                                                                       | -1.54 | -1.54 | 1.07  |
| 209636_at   | NFKB2: nuclear factor of kappa light polypeptide gene enhancer in B-cells 2 (p49/p100)                                                                   | -1.7  | -1.52 | -1.45 |
| 209699_x_at | AKR1C2: aldo-keto reductase family 1, member C2 (dihydrodiol dehydrogenase 2; bile acid binding protein; 3-alpha hydroxysteroid dehydrogenase, type III) | 2.17  | 3.83  | 3.79  |
| 209708_at   | MOXD1: monooxygenase, DBH-like 1                                                                                                                         | -1.03 | 1.99  | 1.75  |
| 209715_at   | CBX5: chromobox homolog 5 (HP1 alpha homolog, Drosophila)                                                                                                | -1.16 | -1.68 | -1.84 |
| 209732_at   | CLEC2B: C-type lectin domain family 2, member B                                                                                                          | 1.2   | 1.99  | 2.13  |
| 209764_at   | CDNA FLJ43371 fis, clone NTONG2005969                                                                                                                    | 1.23  | 1.69  | 1.51  |
| 209806_at   | HIST1H2BK: histone 1, H2bk                                                                                                                               | -1.14 | 1.83  | 3.25  |
| 209832_s_at | CDT1: chromatin licensing and DNA replication factor 1                                                                                                   | 1.01  | -1.6  | -2.17 |
| 209846_s_at | BTN3A2: butyrophilin, subfamily 3, member A2                                                                                                             | 1.03  | 1.63  | 1.59  |
| 209864_at   | FRAT2: frequently rearranged in advanced T-cell lymphomas 2                                                                                              | 1.21  | 1.68  | 1.85  |
| 209933_s_at | CD300A: CD300a molecule                                                                                                                                  | 1.23  | 1.52  | 1.6   |
| 209949_at   | NCF2: neutrophil cytosolic factor 2 (65kDa, chronic granulomatous disease, autosomal 2)                                                                  | 1.08  | 1.92  | 1.73  |
| 210253_at   | HTATIP2: HIV-1 Tat interactive protein 2, 30kDa                                                                                                          | 1.17  | 1.64  | 1.51  |
| 210370_s_at | LY9: lymphocyte antigen 9                                                                                                                                | 1.07  | 1.8   | 1.98  |
| 210432_s_at | SCN3A: sodium channel, voltage-gated, type III, alpha                                                                                                    | 1.2   | 2.56  | 3.46  |
| 210448_s_at | P2RX5: purinergic receptor P2X, ligand-gated ion channel, 5                                                                                              | -1.31 | -1.51 | -1.61 |
| 210519_s_at | NQO1: NAD(P)H dehydrogenase, quinone 1                                                                                                                   | 3.07  | 3.66  | 3.26  |
| 210567_s_at | SKP2: S-phase kinase-associated protein 2 (p45)                                                                                                          | -1.11 | -1.72 | -1.64 |
| 210983_s_at | MCM7: MCM7 minichromosome maintenance deficient 7 ( <i>S. cerevisiae</i> )                                                                               | -1.07 | -1.87 | -2.03 |
| 211138_s_at | KMO: kynurenine 3-monooxygenase (kynurenine 3-hydroxylase)                                                                                               | -1.06 | 1.57  | 2.12  |
| 211450_s_at | MSH6: mutS homolog 6 ( <i>E. coli</i> )                                                                                                                  | 1.02  | -1.56 | -1.6  |
| 211458_s_at | GABARAPL1 /// GABARAPL3: GABA(A) receptor-associated protein like 1 /// GABA(A) receptors associated protein like 3                                      | 2.06  | 2.47  | 2.27  |
| 211597_s_at | HOP: homeodomain-only protein /// homeodomain-only protein                                                                                               | 1.13  | 2.42  | 2.22  |

|             |                                                                                                                                                                                                                                                                                                               |       |       |       |
|-------------|---------------------------------------------------------------------------------------------------------------------------------------------------------------------------------------------------------------------------------------------------------------------------------------------------------------|-------|-------|-------|
| 211653_x_at | AKR1C2: aldo-keto reductase family 1, member C2 (dihydrodiol dehydrogenase 2; bile acid binding protein; 3-alpha hydroxysteroid dehydrogenase, type III) /// aldo-keto reductase family 1, member C2 (dihydrodiol dehydrogenase 2; bile acid binding protein; 3-alpha hydroxysteroid dehydrogenase, type III) | 2.67  | 4.66  | 5.19  |
| 211697_x_at | LOC56902: putative 28 kDa protein /// putative 28 kDa protein                                                                                                                                                                                                                                                 | 1.5   | 1.54  | 1.65  |
| 211856_x_at | CD28: CD28 molecule                                                                                                                                                                                                                                                                                           | 1.2   | 1.63  | 1.54  |
| 211937_at   | EIF4B: eukaryotic translation initiation factor 4B                                                                                                                                                                                                                                                            | 1.09  | 1.53  | 1.62  |
| 212085_at   | SLC25A6: solute carrier family 25 (mitochondrial carrier; adenine nucleotide translocator), member 6                                                                                                                                                                                                          | 1.22  | 1.8   | 1.73  |
| 212135_s_at | ATP2B4: ATPase, Ca++ transporting, plasma membrane 4                                                                                                                                                                                                                                                          | 1.34  | 1.94  | 1.63  |
| 212136_at   | ATP2B4: ATPase, Ca++ transporting, plasma membrane 4                                                                                                                                                                                                                                                          | 1.14  | 2.07  | 1.62  |
| 212141_at   | MCM4: MCM4 minichromosome maintenance deficient 4 ( <i>S. cerevisiae</i> )                                                                                                                                                                                                                                    | 1.02  | -1.83 | -1.99 |
| 212142_at   | MCM4: MCM4 minichromosome maintenance deficient 4 ( <i>S. cerevisiae</i> )                                                                                                                                                                                                                                    | -1.13 | -1.76 | -2.24 |
| 212205_at   | H2AFV: H2A histone family, member V                                                                                                                                                                                                                                                                           | -1.12 | -1.57 | -1.58 |
| 212335_at   | GNS: glucosamine (N-acetyl)-6-sulfatase (Sanfilippo disease IIID)                                                                                                                                                                                                                                             | 1.06  | 1.54  | 1.52  |
| 212382_at   | CDNA FLJ37747 fis, clone BRHIP2022986                                                                                                                                                                                                                                                                         | -1.67 | -1.65 | -1.24 |
| 212383_at   | ATP6V0A1: ATPase, H+ transporting, lysosomal V0 subunit a1                                                                                                                                                                                                                                                    | 1.33  | 1.75  | 1.95  |
| 212385_at   | CDNA FLJ37747 fis, clone BRHIP2022986                                                                                                                                                                                                                                                                         | -1.64 | -1.6  | -1.28 |
| 212386_at   | CDNA FLJ37747 fis, clone BRHIP2022986                                                                                                                                                                                                                                                                         | -1.64 | -1.61 | -1.26 |
| 212457_at   | TFE3: transcription factor binding to IGHM enhancer 3                                                                                                                                                                                                                                                         | 1.39  | 1.57  | 1.54  |
| 212593_s_at | PDCD4: programmed cell death 4 (neoplastic transformation inhibitor)                                                                                                                                                                                                                                          | 1.19  | 1.85  | 2     |
| 212594_at   | PDCD4: programmed cell death 4 (neoplastic transformation inhibitor)                                                                                                                                                                                                                                          | 1.1   | 1.85  | 1.87  |
| 212614_at   | ARID5B: AT rich interactive domain 5B (MRF1-like)                                                                                                                                                                                                                                                             | 1.28  | 2.08  | 2.14  |
| 212634_at   | KIAA0776: KIAA0776                                                                                                                                                                                                                                                                                            | -1.52 | -1.69 | -1.08 |
| 212642_s_at | HIVP2: human immunodeficiency virus type I enhancer binding protein 2                                                                                                                                                                                                                                         | 1.12  | 1.58  | 1.75  |
| 212660_at   | PHF15: PHD finger protein 15                                                                                                                                                                                                                                                                                  | 1.43  | 1.74  | 1.67  |
| 212737_at   | GM2A: GM2 ganglioside activator                                                                                                                                                                                                                                                                               | 1.11  | 1.59  | 1.84  |
| 212788_x_at | FTL: ferritin, light polypeptide                                                                                                                                                                                                                                                                              | 1.59  | 1.66  | 1.59  |
| 212826_s_at | SLC25A6: solute carrier family 25 (mitochondrial carrier; adenine nucleotide translocator), member 6                                                                                                                                                                                                          | 1.16  | 1.64  | 1.56  |
| 212843_at   | NCAM1: neural cell adhesion molecule 1                                                                                                                                                                                                                                                                        | 3.03  | 6.63  | 8.53  |

|             |                                                                                                                                                                                                            |       |       |       |
|-------------|------------------------------------------------------------------------------------------------------------------------------------------------------------------------------------------------------------|-------|-------|-------|
| 212913_at   | MSH5 /// C6orf26: mutS homolog 5 (E. coli) /// chromosome 6 open reading frame 26                                                                                                                          | -1.49 | -1.69 | -1.68 |
| 212920_at   | gb:AV682285 /DB_XREF=gi:10284148 /DB_XREF=AV682285 /CLONE=GKBACA04 /FEA=EST /CNT=65 /TID=Hs.227630.1 /TIER=Stack /STK=40 /UG=Hs.227630 /LL=5978 /UG_GENE=REST /UG_TITLE=RE1-silencing transcription factor | -1.55 | -1.76 | -1.3  |
| 213002_at   | MARCKS: Myristoylated alanine-rich protein kinase C substrate                                                                                                                                              | -2.82 | -1.58 | -1.51 |
| 213008_at   | KIAA1794: KIAA1794                                                                                                                                                                                         | -1.03 | -1.64 | -1.66 |
| 213092_x_at | DNAJC9: DnaJ (Hsp40) homolog, subfamily C, member 9                                                                                                                                                        | 1.02  | -1.7  | -1.67 |
| 213187_x_at | FTL: ferritin, light polypeptide                                                                                                                                                                           | 1.77  | 1.87  | 1.76  |
| 213261_at   | LBA1: lupus brain antigen 1                                                                                                                                                                                | -1.06 | 2.34  | 2.42  |
| 213534_s_at | PASK: PAS domain containing serine/threonine kinase                                                                                                                                                        | -1.13 | -1.54 | -1.96 |
| 213606_s_at | ARHGDI1: Rho GDP dissociation inhibitor (GDI) alpha                                                                                                                                                        | -1.24 | -1.59 | -1.66 |
| 213638_at   | PHACTR1: phosphatase and actin regulator 1                                                                                                                                                                 | -1.85 | -2.04 | -1.74 |
| 213891_s_at | CDNA FLJ37747 fis, clone BRHIP2022986                                                                                                                                                                      | -1.6  | -1.67 | -1.26 |
| 213951_s_at | PSMC3IP: PSMC3 interacting protein                                                                                                                                                                         | -1.5  | -2.24 | -2.23 |
| 214023_x_at | TUBB2B: tubulin, beta 2B                                                                                                                                                                                   | -1.72 | -2.33 | -2.35 |
| 214057_at   | MCL1: Myeloid cell leukemia sequence 1 (BCL2-related)                                                                                                                                                      | 1.67  | 2.21  | 2.18  |
| 214152_at   | CCPG1: cell cycle progression 1                                                                                                                                                                            | 1.61  | 1.66  | 2.52  |
| 214211_at   | FTH1: ferritin, heavy polypeptide 1                                                                                                                                                                        | 2.25  | 1.65  | 1.5   |
| 214290_s_at | HIST2H2AA3 /// LOC653610 /// HIST2H2AA4: histone 2, H2aa3 /// similar to Histone H2A.o (H2A/o) (H2A.2) (H2a-615) /// histone 2, H2aa4                                                                      | -1.21 | -1.57 | -1.81 |
| 214430_at   | GLA: galactosidase, alpha                                                                                                                                                                                  | 1.94  | 2.13  | 1.73  |
| 214582_at   | PDE3B: phosphodiesterase 3B, cGMP-inhibited                                                                                                                                                                | 1.06  | 1.7   | 1.7   |
| 214615_at   | P2RY10: purinergic receptor P2Y, G-protein coupled, 10                                                                                                                                                     | 1.54  | 2.02  | 2.21  |
| 214620_x_at | PAM: peptidylglycine alpha-amidating monooxygenase                                                                                                                                                         | 1.23  | 1.86  | 1.82  |
| 215071_s_at | HIST1H2AC: histone 1, H2ac                                                                                                                                                                                 | -1.25 | 1.86  | 3.13  |
| 215111_s_at | TSC22D1: TSC22 domain family, member 1                                                                                                                                                                     | 1.21  | 2.01  | 1.98  |
| 215136_s_at | EXOSC8: exosome component 8                                                                                                                                                                                | -1.18 | -1.51 | -1.58 |
| 215137_at   | KIAA0508: KIAA0508 protein                                                                                                                                                                                 | -1.26 | -1.89 | -1.72 |
| 215333_x_at | GSTM1: glutathione S-transferase M1                                                                                                                                                                        | 1.31  | 1.62  | 1.65  |
| 215629_s_at | DLEU2 /// DLEU2L: deleted in lymphocytic leukemia, 2 /// deleted in lymphocytic leukemia 2-like                                                                                                            | -1.13 | -2.52 | -2.26 |
| 215967_s_at | LY9: lymphocyte antigen 9                                                                                                                                                                                  | 1.05  | 1.78  | 1.89  |
| 216237_s_at | MCM5: MCM5 minichromosome maintenance deficient 5, cell division cycle 46 (S. cerevisiae)                                                                                                                  | -1.04 | -1.97 | -2.46 |

|             |                                                                                                                                                                                             |       |       |       |
|-------------|---------------------------------------------------------------------------------------------------------------------------------------------------------------------------------------------|-------|-------|-------|
| 216508_x_at | HMGB1 /// HMG1L1 /// LOC644380: high-mobility group box 1 /// high-mobility group (nonhistone chromosomal) protein 1-like 1 /// similar to High mobility group protein 1-like 10 (HMG-1L10) | -1.18 | -1.54 | -1.69 |
| 216594_x_at | AKR1C1: ald-keto reductase family 1, member C1 (dihydrodiol dehydrogenase 1; 20-alpha (3-alpha)-hydroxysteroid dehydrogenase)                                                               | 1.63  | 2.39  | 2.33  |
| 216834_at   | RGS1: regulator of G-protein signalling 1                                                                                                                                                   | 1.02  | 2.37  | 2.69  |
| 216870_x_at | DLEU2: deleted in lymphocytic leukemia, 2                                                                                                                                                   | -1.22 | -2.7  | -2    |
| 216945_x_at | PASK: PAS domain containing serine/threonine kinase                                                                                                                                         | 1.03  | -1.57 | -1.83 |
| 217119_s_at | CXCR3: chemokine (C-X-C motif) receptor 3                                                                                                                                                   | 1.55  | 2.21  | 2.26  |
| 217147_s_at | TRAT1: T cell receptor associated transmembrane adaptor 1                                                                                                                                   | 2.27  | 2.28  | 2.74  |
| 217678_at   | SLC7A11: solute carrier family 7, (cationic amino acid transporter, y+ system) member 11                                                                                                    | 2.62  | -1.02 | 1.63  |
| 217783_s_at | YPEL5: yippee-like 5 (Drosophila)                                                                                                                                                           | 1.28  | 1.95  | 2.06  |
| 217846_at   | QARS: glutaminyl-tRNA synthetase                                                                                                                                                            | 1.15  | 1.57  | 1.69  |
| 217905_at   | C10orf119: chromosome 10 open reading frame 119                                                                                                                                             | -1.19 | -1.57 | -1.57 |
| 217914_at   | TPCN1: two pore segment channel 1                                                                                                                                                           | -1.54 | -1.51 | -1.51 |
| 217967_s_at | C1orf24: chromosome 1 open reading frame 24                                                                                                                                                 | -1.2  | -1.81 | -1.94 |
| 217973_at   | DCXR: dicarbonyl/L-xylulose reductase                                                                                                                                                       | -1.24 | -1.61 | -1.63 |
| 217989_at   | DHRS8: dehydrogenase/reductase (SDR family) member 8                                                                                                                                        | 1.13  | 1.96  | 1.84  |
| 218041_x_at | SLC38A2: solute carrier family 38, member 2                                                                                                                                                 | 1.2   | 1.55  | 1.58  |
| 218113_at   | TMEM2: transmembrane protein 2                                                                                                                                                              | 1.16  | 1.52  | 1.77  |
| 218161_s_at | CLN6: ceroid-lipofuscinosis, neuronal 6, late infantile, variant                                                                                                                            | -1.4  | -1.78 | -1.67 |
| 218285_s_at | BDH2: 3-hydroxybutyrate dehydrogenase, type 2                                                                                                                                               | 1.2   | 1.52  | 1.61  |
| 218358_at   | CRELD2: cysteine-rich with EGF-like domains 2                                                                                                                                               | -1.36 | -1.97 | -1.7  |
| 218380_at   | NALP1: NACHT, leucine rich repeat and PYD (pyrin domain) containing 1                                                                                                                       | 1.02  | 1.55  | 1.65  |
| 218585_s_at | DTL: denticleless homolog (Drosophila)                                                                                                                                                      | -1.09 | -1.6  | -1.89 |
| 218602_s_at | FAM29A: family with sequence similarity 29, member A                                                                                                                                        | -1.1  | -1.93 | -1.54 |
| 218705_s_at | SNX24: sorting nexin 24                                                                                                                                                                     | -1.27 | -1.94 | -1.94 |
| 218782_s_at | ATAD2: ATPase family, AAA domain containing 2                                                                                                                                               | 1.09  | -1.68 | -1.57 |
| 218802_at   | CCDC109B: coiled-coil domain containing 109B                                                                                                                                                | -1.34 | -1.75 | -1.85 |
| 218839_at   | HEY1: hairy/enhancer-of-split related with YRPW motif 1                                                                                                                                     | 1.39  | 1.91  | 1.94  |
| 218875_s_at | FBXO5: F-box protein 5                                                                                                                                                                      | -1.09 | -1.74 | -1.67 |
| 218918_at   | MAN1C1: mannosidase, alpha, class 1C, member 1                                                                                                                                              | 1.26  | 1.73  | 1.57  |
| 218951_s_at | PLCXD1: phosphatidylinositol-specific phospholipase C, X domain containing 1                                                                                                                | -1.11 | -1.55 | -1.68 |

|             |                                                                                                                                                                                                                                     |       |       |       |
|-------------|-------------------------------------------------------------------------------------------------------------------------------------------------------------------------------------------------------------------------------------|-------|-------|-------|
| 218979_at   | RMI1: RMI1, RecQ mediated genome instability 1, homolog (S. cerevisiae)                                                                                                                                                             | -1.11 | -1.65 | -1.66 |
| 218999_at   | TMEM140: transmembrane protein 140                                                                                                                                                                                                  | 1.69  | 3.24  | 3.17  |
| 219002_at   | FASTKD1: FAST kinase domains 1                                                                                                                                                                                                      | 1.36  | 1.58  | 1.58  |
| 219258_at   | TIPIN: TIMELESS interacting protein                                                                                                                                                                                                 | -1.05 | -1.6  | -1.89 |
| 219294_at   | CENPQ: centromere protein Q                                                                                                                                                                                                         | 1.02  | -1.52 | -1.58 |
| 219306_at   | KIF15 /// C7orf9: kinesin family member 15 /// chromosome 7 open reading frame 9                                                                                                                                                    | -1.11 | -1.94 | -1.71 |
| 219319_at   | HIF3A: hypoxia inducible factor 3, alpha subunit                                                                                                                                                                                    | -1.47 | -1.78 | -1.54 |
| 219371_s_at | KLF2: Kruppel-like factor 2 (lung)                                                                                                                                                                                                  | -2.34 | -2.47 | -2.62 |
| 219410_at   | TMEM45A: transmembrane protein 45A                                                                                                                                                                                                  | 1.07  | 2.16  | 2.57  |
| 219431_at   | ARHGAP10: Rho GTPase activating protein 10                                                                                                                                                                                          | -1.49 | -1.68 | -1.69 |
| 219540_at   | ZNF267: zinc finger protein 267                                                                                                                                                                                                     | -1.6  | -1.97 | -1.32 |
| 219684_at   | RTP4: receptor transporter protein 4                                                                                                                                                                                                | 1.03  | 1.75  | 1.85  |
| 219895_at   | FAM70A: family with sequence similarity 70, member A                                                                                                                                                                                | 1.92  | 2     | 2.09  |
| 220059_at   | BRDG1: BCR downstream signaling 1                                                                                                                                                                                                   | -1.14 | 1.67  | 1.77  |
| 220085_at   | HELLS: helicase, lymphoid-specific                                                                                                                                                                                                  | 1.1   | -1.88 | -1.97 |
| 220201_at   | MNAB: membrane associated DNA binding protein                                                                                                                                                                                       | 1.27  | 1.76  | 1.6   |
| 220223_at   | C17orf41: chromosome 17 open reading frame 41                                                                                                                                                                                       | 1.03  | -1.99 | -1.58 |
| 220255_at   | FANCE: Fanconi anemia, complementation group E                                                                                                                                                                                      | -1.12 | -1.68 | -1.76 |
| 220277_at   | CXXC4: CXXC finger 4                                                                                                                                                                                                                | -1.13 | 1.52  | 1.78  |
| 220466_at   | CCDC15: coiled-coil domain containing 15                                                                                                                                                                                            | -1.27 | -1.8  | -1.59 |
| 220651_s_at | MCM10: MCM10 minichromosome maintenance deficient 10 (S. cerevisiae)                                                                                                                                                                | 1.01  | -1.62 | -1.93 |
| 220924_s_at | SLC38A2: solute carrier family 38, member 2                                                                                                                                                                                         | 1.25  | 1.57  | 1.63  |
| 220969_s_at | gb:NM_030892.1 /DB_XREF=gi:13569855 /GEN=FLJ11786 /FEA=FLmRNA /CNT=1 /TID=HsAffx.900103.84 /TIER=FL /STK=0 /DEF=Homo sapiens hypothetical protein FLJ11786 (FLJ11786), mRNA. /PROD=hypothetical protein FLJ11786 /FL=gb:NM_030892.1 | -1.18 | -1.58 | -1.67 |
| 220987_s_at | C11orf17 /// NUA2: chromosome 11 open reading frame 17 /// chromosome 11 open reading frame 17 /// NUA2 family, SNF1-like kinase, 2 /// NUA2 family, SNF1-like kinase, 2                                                            | 1.16  | 1.52  | 1.69  |
| 221156_x_at | CCPG1: cell cycle progression 1                                                                                                                                                                                                     | 1.51  | 1.36  | 1.82  |
| 221479_s_at | BNIP3L: BCL2/adenovirus E1B 19kDa interacting protein 3-like /// BCL2/adenovirus E1B 19kDa interacting protein 3-like                                                                                                               | -1.23 | 1.62  | 1.87  |
| 221511_x_at | CCPG1: cell cycle progression 1                                                                                                                                                                                                     | 1.34  | 1.57  | 2.25  |
| 221521_s_at | GINS2: GINS complex subunit 2 (Psf2 homolog)                                                                                                                                                                                        | -1.08 | -1.95 | -2.24 |
| 221525_at   | DKFZp761I2123: hypothetical protein DKFZp761I2123                                                                                                                                                                                   | -1.55 | -1.78 | -1.88 |



|             |                                                                                                            |       |       |       |
|-------------|------------------------------------------------------------------------------------------------------------|-------|-------|-------|
| 221530_s_at | BHLHB3: basic helix-loop-helix domain containing, class B, 3                                               | 1.49  | 2.35  | 2.27  |
| 221565_s_at | FAM26B: family with sequence similarity 26, member B                                                       | 1.48  | 1.85  | 1.64  |
| 221611_s_at | PHF7: PHD finger protein 7                                                                                 | 1.68  | 1.53  | 1.36  |
| 221677_s_at | DONSON: downstream neighbor of SON                                                                         | -1.11 | -1.53 | -1.73 |
| 221698_s_at | CLEC7A: C-type lectin domain family 7, member A /// C-type lectin domain family 7, member A                | -1.26 | 1.78  | 2.09  |
| 221703_at   | BRIP1: BRCA1 interacting protein C-terminal helicase 1 /// BRCA1 interacting protein C-terminal helicase 1 | -1.06 | -1.81 | -1.67 |
| 221756_at   | MGC17330: HGFL gene /// HGFL gene                                                                          | 1.2   | 1.52  | 1.61  |
| 221824_s_at | MARCH8: membrane-associated ring finger (C3HC4) 8                                                          | 1.12  | 1.56  | 1.55  |
| 221905_at   | CYLD: cylindromatosis (turban tumor syndrome)                                                              | -1.68 | -1.79 | -1.44 |
| 221960_s_at | RAB2: RAB2, member RAS oncogene family                                                                     | 1.82  | 1.73  | 1.61  |
| 221985_at   | KLHL24: kelch-like 24 (Drosophila)                                                                         | 1.63  | 3.02  | 3.05  |
| 221986_s_at | KLHL24: kelch-like 24 (Drosophila)                                                                         | 1.39  | 2.56  | 2.94  |
| 222037_at   | MCM4: MCM4 minichromosome maintenance deficient 4 (S. cerevisiae)                                          | -1.02 | -1.71 | -2.05 |
| 222111_at   | CDNA clone IMAGE:4794011                                                                                   | -1.69 | -2.01 | -1.45 |
| 222139_at   | KIAA1466: KIAA1466 gene                                                                                    | 2.3   | 4.16  | 6.8   |
| 222146_s_at | TCF4: transcription factor 4                                                                               | -1.67 | -1.54 | -1.21 |
| 222156_x_at | CCPG1: cell cycle progression 1                                                                            | 1.43  | 1.56  | 2.23  |
| 222201_s_at | CASP8AP2: CASP8 associated protein 2                                                                       | -1.13 | -2.24 | -1.58 |
| 222309_at   | C6orf62: Chromosome 6 open reading frame 62                                                                | -1.33 | -1.56 | -1.58 |
| 222317_at   | PDE3B: Phosphodiesterase 3B, cGMP-inhibited                                                                | 1.56  | 2.67  | 3.1   |
| 222408_s_at | YPEL5: yippee-like 5 (Drosophila)                                                                          | 1.4   | 2.13  | 2.08  |
| 222680_s_at | DTL: denticleless homolog (Drosophila)                                                                     | -1.01 | -1.59 | -1.72 |
| 222740_at   | ATAD2: ATPase family, AAA domain containing 2                                                              | 1     | -1.59 | -1.71 |
| 222848_at   | CENPK: centromere protein K                                                                                | -1.22 | -2.35 | -2.29 |
| 222962_s_at | MCM10: MCM10 minichromosome maintenance deficient 10 (S. cerevisiae)                                       | 1.12  | -1.62 | -1.98 |
| 223044_at   | SLC40A1: solute carrier family 40 (iron-regulated transporter), member 1                                   | 1.43  | 1.94  | 1.68  |
| 223165_s_at | IHPK2: inositol hexaphosphate kinase 2                                                                     | 1.01  | 1.62  | 1.58  |
| 223248_at   | HSDL1: hydroxysteroid dehydrogenase like 1                                                                 | 1.24  | 1.52  | 1.54  |
| 223318_s_at | ALKBH7: alkB, alkylation repair homolog 7 (E. coli)                                                        | 1.13  | 1.66  | 1.87  |
| 223363_at   | MGC10911: hypothetical protein MGC10911                                                                    | -1.21 | -1.53 | -1.56 |
| 223492_s_at | LRRFIP1: leucine rich repeat (in FLII) interacting protein 1                                               | -1.31 | -1.6  | -2    |
| 223493_at   | FBXO4: F-box protein 4                                                                                     | -1.51 | -1.67 | -1.57 |
| 223517_at   | FBXO44: F-box protein 44                                                                                   | 1.5   | 1.97  | 1.8   |

|             |                                                                                                          |       |       |       |
|-------------|----------------------------------------------------------------------------------------------------------|-------|-------|-------|
| 223556_at   | HELLS: helicase, lymphoid-specific                                                                       | -1.13 | -1.74 | -1.97 |
| 223570_at   | MCM10: MCM10 minichromosome maintenance deficient 10 ( <i>S. cerevisiae</i> )                            | 1.14  | -1.51 | -1.95 |
| 223596_at   | SLC12A6: solute carrier family 12 (potassium/chloride transporters), member 6                            | 1.34  | 2.44  | 2.36  |
| 224320_s_at | MCM8: MCM8 minichromosome maintenance deficient 8 ( <i>S. cerevisiae</i> )                               | 1.04  | -1.54 | -1.71 |
| 224428_s_at | CDCA7: cell division cycle associated 7 /// cell division cycle associated 7                             | -1.7  | -3.16 | -3.25 |
| 224444_s_at | C1orf97: chromosome 1 open reading frame 97 /// chromosome 1 open reading frame 97                       | -1.11 | 1.57  | 1.67  |
| 224478_s_at | MGC11257: hypothetical protein MGC11257 /// hypothetical protein MGC11257                                | -1.22 | -1.88 | -1.81 |
| 224480_s_at | LPAAT-THETA: lysophosphatidic acid acyltransferase theta /// lysophosphatidic acid acyltransferase theta | 2.54  | 1.87  | 1.6   |
| 224596_at   | SLC44A1: solute carrier family 44, member 1                                                              | -1.01 | 1.75  | 1.78  |
| 224650_at   | MAL2: mal, T-cell differentiation protein 2                                                              | -1.35 | -2.71 | -3.06 |
| 224731_at   | HMGB1: high-mobility group box 1                                                                         | -1.14 | -1.53 | -1.6  |
| 224741_x_at | GAS5: growth arrest-specific 5                                                                           | 1.22  | 1.56  | 1.73  |
| 224772_at   | NAV1: neuron navigator 1                                                                                 | -1.73 | -1.6  | -1.75 |
| 224783_at   | FAM100B: family with sequence similarity 100, member B                                                   | 1.18  | 1.53  | 1.52  |
| 224968_at   | CCDC104: coiled-coil domain containing 104                                                               | 1.05  | 1.58  | 1.98  |
| 225046_at   | MRNA; cDNA DKFZp686H157 (from clone DKFZp686H157)                                                        | -1.18 | -1.63 | -1.87 |
| 225047_at   | NUPL1: nucleoporin like 1                                                                                | -1.12 | -1.54 | -1.83 |
| 225074_at   | RAB2B: RAB2B, member RAS oncogene family                                                                 | 1.24  | 1.57  | 1.6   |
| 225107_at   | HNRPA2B1: Heterogeneous nuclear ribonucleoprotein A2/B1                                                  | -1.41 | -1.92 | -1.68 |
| 225123_at   | MRNA; cDNA DKFZp313B1017 (from clone DKFZp313B1017)                                                      | 1.55  | 1.82  | 1.67  |
| 225164_s_at | EIF2AK4: eukaryotic translation initiation factor 2 alpha kinase 4                                       | 1.16  | 2.41  | 2.25  |
| 225252_at   | SRXN1: sulfiredoxin 1 homolog ( <i>S. cerevisiae</i> )                                                   | 4.57  | 3.44  | 2.93  |
| 225287_s_at | TMEM55B: transmembrane protein 55B                                                                       | 1.33  | 1.74  | 1.58  |
| 225540_at   | MAP2: microtubule-associated protein 2                                                                   | 1.66  | 2.12  | 2.32  |
| 225548_at   | SHROOM3: shroom family member 3                                                                          | 1.22  | 1.68  | 1.58  |
| 225564_at   | SPATA13: spermatogenesis associated 13                                                                   | -1.02 | -1.62 | -1.91 |
| 225567_at   | LOC388114: Hypothetical LOC388114                                                                        | -2.37 | -1.8  | -1.69 |
| 225609_at   | GSR: glutathione reductase                                                                               | 2.74  | 1.87  | 1.83  |
| 225655_at   | UHRF1: ubiquitin-like, containing PHD and RING finger domains, 1                                         | -1.11 | -1.66 | -2.04 |
| 225662_at   | ZAK: sterile alpha motif and leucine zipper containing kinase AZK                                        | -1.13 | -1.66 | -1.65 |
| 225665_at   | ZAK: sterile alpha motif and leucine zipper containing kinase AZK                                        | 1.04  | -1.61 | -1.66 |

|             |                                                                                                                                                                                                                     |       |       |       |
|-------------|---------------------------------------------------------------------------------------------------------------------------------------------------------------------------------------------------------------------|-------|-------|-------|
| 225684_at   | FAM33A: family with sequence similarity 33, member A                                                                                                                                                                | -1.27 | -1.63 | -1.51 |
| 225686_at   | FAM33A: family with sequence similarity 33, member A                                                                                                                                                                | -1.26 | -1.8  | -1.76 |
| 225768_at   | NR1D2: nuclear receptor subfamily 1, group D, member 2                                                                                                                                                              | 1.95  | 1.37  | 1.51  |
| 225793_at   | LIX1L: Lix1 homolog (mouse) like                                                                                                                                                                                    | 1.17  | 1.85  | 1.75  |
| 225803_at   | FBXO32: F-box protein 32                                                                                                                                                                                            | 1.08  | 2.46  | 2.25  |
| 225809_at   | DKFZP564O0823: DKFZP564O0823 protein                                                                                                                                                                                | -1.34 | -1.55 | -1.52 |
| 225885_at   | EEA1: early endosome antigen 1, 162kD                                                                                                                                                                               | -1.57 | -2.64 | -1.46 |
| 225897_at   | Homo sapiens, clone IMAGE:5547644, mRNA                                                                                                                                                                             | -3.21 | -1.99 | -1.9  |
| 225912_at   | TP53INP1: tumor protein p53 inducible nuclear protein 1                                                                                                                                                             | 1.36  | 2.22  | 2.23  |
| 225922_at   | KIAA1450: KIAA1450 protein                                                                                                                                                                                          | -1.62 | -1.55 | -1.5  |
| 225924_at   | KIAA1450: KIAA1450 protein                                                                                                                                                                                          | -1.51 | -1.52 | -1.51 |
| 225956_at   | LOC153222: adult retina protein                                                                                                                                                                                     | -1.18 | 1.75  | 2.38  |
| 225957_at   | LOC153222: adult retina protein                                                                                                                                                                                     | -1.03 | 1.65  | 2.37  |
| 226003_at   | KIF21A: kinesin family member 21A                                                                                                                                                                                   | -1.06 | -1.94 | -1.56 |
| 226037_s_at | TAF9B /// LOC653068: TAF9B RNA polymerase II, TATA box binding protein (TBP)-associated factor, 31kDa /// similar to TBP-associated factor 9L                                                                       | -1.32 | -1.59 | -1.75 |
| 226085_at   | CDNA clone IMAGE:4842353                                                                                                                                                                                            | -1.23 | -1.51 | -1.78 |
| 226140_s_at | OTUD1: OTU domain containing 1                                                                                                                                                                                      | 1.42  | 1.66  | 1.62  |
| 226150_at   | PPAPDC1B: Phosphatidic acid phosphatase type 2 domain containing 1B                                                                                                                                                 | -1.52 | -1.58 | -1.29 |
| 226158_at   | KLHL24: kelch-like 24 (Drosophila)                                                                                                                                                                                  | 1.48  | 2.15  | 2.97  |
| 226208_at   | ZSWIM6: zinc finger, SWIM-type containing 6                                                                                                                                                                         | 1.08  | 1.59  | 1.62  |
| 226308_at   | NY-SAR-48: sarcoma antigen NY-SAR-48                                                                                                                                                                                | -1.17 | -1.67 | -1.69 |
| 226336_at   | gb:T62044 /DB_XREF=gi:665287 /DB_XREF=yc66b09.s1 /CLONE=IMAGE:85625 /FEA=EST /CNT=48 /TID=Hs.182937.3 /TIER=Stack /STK=47 /UG=Hs.182937 /LL=5478 /UG_GENE=PPIA /UG_TITLE=peptidylprolyl isomerase A (cyclophilin A) | -1.17 | -1.71 | -1.8  |
| 226363_at   | ABCC5: ATP-binding cassette, sub-family C (CFTR/MRP), member 5                                                                                                                                                      | 1.26  | 2.13  | 1.85  |
| 226397_s_at | TBC1D7: TBC1 domain family, member 7                                                                                                                                                                                | -2.07 | -1.94 | -1.61 |
| 226416_at   | THEX1: three prime histone mRNA exonuclease 1                                                                                                                                                                       | -1.06 | -1.71 | -1.92 |
| 226421_at   | AMMECR1: Alport syndrome, mental retardation, midface hypoplasia and elliptocytosis chromosomal region, gene 1                                                                                                      | -1.2  | -1.57 | -1.53 |
| 226436_at   | RASSF4: Ras association (RalGDS/AF-6) domain family 4                                                                                                                                                               | -1.94 | -1.83 | -1.91 |
| 226446_at   | HES6: hairy and enhancer of split 6 (Drosophila)                                                                                                                                                                    | 1.04  | -1.7  | -2.08 |
| 226456_at   | C16orf75: chromosome 16 open reading frame 75                                                                                                                                                                       | -1.48 | -1.78 | -1.9  |
| 226530_at   | BMF: Bcl2 modifying factor                                                                                                                                                                                          | 1.24  | 1.86  | 1.76  |
| 226619_at   | SENP1: SUMO1/sentrin specific peptidase 1                                                                                                                                                                           | -1.1  | -1.57 | -1.52 |

|             |                                                                                                                                                                                                            |       |       |       |
|-------------|------------------------------------------------------------------------------------------------------------------------------------------------------------------------------------------------------------|-------|-------|-------|
| 226741_at   | SLC12A6: solute carrier family 12 (potassium/chloride transporters), member 6                                                                                                                              | 1.14  | 1.63  | 1.53  |
| 226821_at   | RIF1: RAP1 interacting factor homolog (yeast)                                                                                                                                                              | 1.01  | -2.16 | -1.56 |
| 226842_at   | LOC90110: hypothetical protein LOC90110                                                                                                                                                                    | 1.13  | 1.59  | 1.67  |
| 226860_at   | TMEM19: transmembrane protein 19                                                                                                                                                                           | 1.07  | 1.6   | 1.64  |
| 226870_at   | COMTD1: catechol-O-methyltransferase domain containing 1                                                                                                                                                   | -1.3  | -1.57 | -1.55 |
| 226873_at   | CDNA clone IMAGE:4794011                                                                                                                                                                                   | -1.55 | -1.85 | -1.53 |
| 227020_at   | YPEL2: yippee-like 2 (Drosophila)                                                                                                                                                                          | 1.34  | 2.1   | 1.96  |
| 227033_at   | PDIA3: protein disulfide isomerase family A, member 3                                                                                                                                                      | -1.38 | -1.82 | -1.51 |
| 227168_at   | FLJ25967: hypothetical gene supported by AK098833                                                                                                                                                          | 1.83  | 2.21  | 2.16  |
| 227247_at   | PLEKHA8: Pleckstrin homology domain containing, family A (phosphoinositide binding specific) member 8                                                                                                      | 1.06  | 1.96  | 1.82  |
| 227252_at   | LRP10: Low density lipoprotein receptor-related protein 10                                                                                                                                                 | 1.23  | 1.59  | 1.52  |
| 227312_at   | SNTB2: syntrophin, beta 2 (dystrophin-associated protein A1, 59kDa, basic component 2)                                                                                                                     | -1.25 | -1.66 | -1.61 |
| 227349_at   | gb:AI807356 /DB_XREF=gi:5393922 /DB_XREF=wf47c03.x1 /CLONE=IMAGE:2358724 /FEA=mRNA /CNT=38 /TID=Hs.127797.0 /TIER=Stack /STK=11 /UG=Hs.127797 /UG_TITLE=Homo sapiens cDNA FLJ11381 fis, clone HEMBA1000501 | 1.03  | -1.61 | -1.75 |
| 227350_at   | HELLS: Helicase, lymphoid-specific                                                                                                                                                                         | -1.04 | -1.94 | -1.96 |
| 227394_at   | NCAM1: Neural cell adhesion molecule 1                                                                                                                                                                     | 3.39  | 7.91  | 10.76 |
| 227506_at   | SLC16A9: solute carrier family 16, member 9 (monocarboxylic acid transporter 9)                                                                                                                            | -1.15 | -1.82 | -1.8  |
| 227842_at   | RAB30: RAB30, member RAS oncogene family                                                                                                                                                                   | 1.1   | 1.6   | 1.7   |
| 227856_at   | C4orf32: chromosome 4 open reading frame 32                                                                                                                                                                | -1.55 | -1.74 | -2.1  |
| 227878_s_at | ALKBH7: alkB, alkylation repair homolog 7 (E. coli)                                                                                                                                                        | 1.13  | 1.7   | 1.89  |
| 227884_at   | TAF15: TAF15 RNA polymerase II, TATA box binding protein (TBP)-associated factor, 68kDa                                                                                                                    | -1.48 | -1.61 | -1.54 |
| 227894_at   | WDR90: WD repeat domain 90                                                                                                                                                                                 | -1.35 | -1.65 | -1.78 |
| 227985_at   | gb:AI928513 /DB_XREF=gi:5664477 /DB_XREF=wp02h03.x1 /CLONE=IMAGE:2463701 /FEA=EST /CNT=78 /TID=Hs.59203.0 /TIER=Stack /STK=75 /UG=Hs.59203 /UG_TITLE=ESTs                                                  | -1.11 | 1.64  | 1.74  |
| 228003_at   | RAB30: RAB30, member RAS oncogene family                                                                                                                                                                   | -1.04 | 1.85  | 2.18  |
| 228084_at   | CASP6: Caspase 6, apoptosis-related cysteine peptidase                                                                                                                                                     | -1.39 | -1.91 | -1.53 |
| 228151_at   | Transcribed locus                                                                                                                                                                                          | 1.13  | 1.67  | 1.59  |
| 228286_at   | FLJ40869: hypothetical protein FLJ40869                                                                                                                                                                    | -1.11 | -2.02 | -1.65 |

|             |                                                                                                                                                                                              |       |       |       |
|-------------|----------------------------------------------------------------------------------------------------------------------------------------------------------------------------------------------|-------|-------|-------|
| 228287_at   | ING5 /// LOC653066 /// LOC653474 /// LOC653494: inhibitor of growth family, member 5 /// similar to inhibitor of growth family, member 5 /// similar to inhibitor of growth family, member 5 | -1.12 | -1.52 | -1.68 |
| 228361_at   | E2F2: E2F transcription factor 2                                                                                                                                                             | -1.31 | -1.94 | -2.01 |
| 228400_at   | Transcribed locus                                                                                                                                                                            | 1.32  | 1.78  | 1.77  |
| 228401_at   | ATAD2: ATPase family, AAA domain containing 2                                                                                                                                                | 1.04  | -1.83 | -1.53 |
| 228485_s_at | SLC44A1: solute carrier family 44, member 1                                                                                                                                                  | 1.01  | 2.01  | 2.27  |
| 228486_at   | SLC44A1: solute carrier family 44, member 1                                                                                                                                                  | 1.11  | 2.72  | 3.07  |
| 228495_at   | CCDC75: Coiled-coil domain containing 75                                                                                                                                                     | -1.6  | -1.72 | -1.44 |
| 228557_at   | L3MBTL4: L(3)mbt-like 4 (Drosophila)                                                                                                                                                         | -1.68 | -1.57 | -1.57 |
| 228597_at   | C21orf45: chromosome 21 open reading frame 45                                                                                                                                                | -1.09 | -1.56 | -1.81 |
| 228658_at   | C22orf35: chromosome 22 open reading frame 35                                                                                                                                                | 1.63  | 1.92  | 2     |
| 228677_s_at | FLJ21438: hypothetical protein FLJ21438                                                                                                                                                      | 1.43  | 1.61  | 1.53  |
| 228702_at   | FLJ43663 /// LOC641825 /// LOC647017: hypothetical protein FLJ43663 /// hypothetical protein LOC641825 /// hypothetical protein LOC647017                                                    | -1.2  | 1.78  | 2.28  |
| 228728_at   | FLJ21986: hypothetical protein FLJ21986                                                                                                                                                      | 1.5   | 1.68  | 2.26  |
| 228774_at   | CEP78: centrosomal protein 78kDa                                                                                                                                                             | -1.05 | -1.6  | -1.6  |
| 228837_at   | CDNA FLJ37747 fis, clone BRHIP2022986                                                                                                                                                        | -2.09 | -1.75 | -1.28 |
| 228859_at   | LOC91431: prematurely terminated mRNA decay factor-like                                                                                                                                      | -1.23 | -1.91 | -1.61 |
| 228868_x_at | CDT1: DNA replication factor                                                                                                                                                                 | -1.07 | -1.57 | -1.92 |
| 228993_s_at | LOC92482: hypothetical protein LOC92482                                                                                                                                                      | 1.32  | 2.02  | 2.05  |
| 229070_at   | C6orf105: chromosome 6 open reading frame 105                                                                                                                                                | -1.81 | -1.45 | -1.52 |
| 229126_at   | TMEM19: transmembrane protein 19                                                                                                                                                             | 1.12  | 1.66  | 1.73  |
| 229146_at   | C7orf31: chromosome 7 open reading frame 31                                                                                                                                                  | 1.09  | 1.89  | 1.97  |
| 229147_at   | Transcribed locus, strongly similar to NP_958834.1 Ras association (RalGDS/AF-6) domain family 6 isoform b; putative RAS binding protein [Homo sapiens]                                      | 1.57  | 1.5   | 2.07  |
| 229164_s_at | ABTB1: ankyrin repeat and BTB (POZ) domain containing 1                                                                                                                                      | 1.15  | 2.07  | 1.83  |
| 229305_at   | MLF1IP: MLF1 interacting protein                                                                                                                                                             | -1.18 | -2.32 | -1.78 |
| 229307_at   | ANKRD28: ankyrin repeat domain 28                                                                                                                                                            | 1.27  | 1.96  | 2.53  |
| 229431_at   | RFXAP: regulatory factor X-associated protein                                                                                                                                                | -1.53 | -1.47 | -1.69 |
| 229459_at   | FAM19A5: family with sequence similarity 19 (chemokine (C-C motif)-like), member A5                                                                                                          | -1.52 | -2.25 | -1.65 |
| 229498_at   | MRNA; cDNA DKFZp779M2422 (from clone DKFZp779M2422)                                                                                                                                          | -1.17 | -2.15 | -1.7  |
| 229551_x_at | ZNF367: zinc finger protein 367                                                                                                                                                              | -1.11 | -1.65 | -1.84 |

|             |                                                                                     |       |       |       |
|-------------|-------------------------------------------------------------------------------------|-------|-------|-------|
| 229655_at   | FAM19A5: family with sequence similarity 19 (chemokine (C-C motif)-like), member A5 | -1.28 | -2.04 | -1.58 |
| 229656_s_at | FLJ42562: similar to echinoderm microtubule associated protein like 5               | 1.46  | 1.74  | 1.54  |
| 229713_at   | CDNA FLJ13267 fis, clone OVARC1000964                                               | -1.19 | -1.56 | -1.55 |
| 229963_at   | NGFRAP1L1: NGFRAP1-like 1                                                           | -1.35 | -1.71 | -1.69 |
| 230012_at   | C17orf44: chromosome 17 open reading frame 44                                       | 1.16  | 2.91  | 2.94  |
| 230312_at   | Transcribed locus                                                                   | -1.34 | -2.56 | -2.52 |
| 230405_at   | RAD50: RAD50 homolog ( <i>S. cerevisiae</i> )                                       | 1.13  | 1.65  | 1.75  |
| 230769_at   | DENND2C: DENN/MADD domain containing 2C                                             | 1.03  | 1.6   | 1.52  |
| 230968_at   | Full-length cDNA clone CS0DF032YA11 of Fetal brain of Homo sapiens (human)          | 1.11  | 1.65  | 1.71  |
| 231202_at   | ALDH1L2: aldehyde dehydrogenase 1 family, member L2                                 | -1.2  | -2.49 | -2.09 |
| 231259_s_at | Transcribed locus                                                                   | -1.39 | -1.86 | -1.96 |
| 231431_s_at | LOC388114 /// LOC649557: hypothetical LOC388114 /// hypothetical protein LOC649557  | -1.82 | -1.52 | -1.48 |
| 231767_at   | HOXB4: homeobox B4                                                                  | 1.18  | 1.68  | 1.62  |
| 231779_at   | IRAK2: interleukin-1 receptor-associated kinase 2                                   | 1.34  | 2     | 1.66  |
| 231807_at   | KIAA1217: KIAA1217                                                                  | -1.15 | 1.55  | 1.74  |
| 231827_at   | CRLS1: Cardiolipin synthase 1                                                       | -1.03 | -1.65 | -1.53 |
| 231843_at   | DDX55: DEAD (Asp-Glu-Ala-Asp) box polypeptide 55                                    | -1.27 | -1.63 | -1.7  |
| 231862_at   | CDNA clone IMAGE:4842353                                                            | -1.48 | -1.75 | -1.82 |
| 231871_at   | GPR180: G protein-coupled receptor 180                                              | -1.28 | -1.59 | -1.66 |
| 231875_at   | KIF21A: kinesin family member 21A                                                   | -1.11 | -1.7  | -1.55 |
| 231895_at   | SASS6: spindle assembly 6 homolog ( <i>C. elegans</i> )                             | 1.02  | -1.96 | -1.68 |
| 232116_at   | GRHL3: grainyhead-like 3 ( <i>Drosophila</i> )                                      | -2.02 | -1.65 | -1.81 |
| 232291_at   | C13orf25: chromosome 13 open reading frame 25                                       | -1.37 | -2.02 | -1.94 |
| 232760_at   | TEX15: testis expressed sequence 15                                                 | -1.09 | -3.35 | -1.98 |
| 233210_at   | FLJ12120: hypothetical LOC388439                                                    | -1.11 | 1.72  | 1.94  |
| 233235_x_at | CDNA: FLJ21443 fis, clone COL04430                                                  | 1.82  | 1.58  | 1.22  |
| 233463_at   | RASSF6: Ras association (RalGDS/AF-6) domain family 6                               | 1.6   | 1.33  | 2.22  |
| 233933_s_at | OTUD5: OTU domain containing 5                                                      | 1.15  | 1.59  | 1.52  |
| 234863_x_at | FBXO5: F-box protein 5                                                              | -1.12 | -1.62 | -1.7  |
| 235142_at   | ZBTB8: zinc finger and BTB domain containing 8                                      | -1.62 | -1.62 | -1.34 |
| 235203_at   | Homo sapiens, clone IMAGE:3866695, mRNA                                             | -1.13 | -1.83 | -1.83 |
| 235266_at   | ATAD2: ATPase family, AAA domain containing 2                                       | -1.03 | -1.63 | -1.73 |
| 235278_at   | C20orf133: chromosome 20 open reading frame 133                                     | 1.05  | 1.79  | 2.7   |
| 235310_at   | GCET2: germinal center expressed transcript 2                                       | -1.02 | 1.58  | 1.6   |

|             |                                                                                            |       |       |       |
|-------------|--------------------------------------------------------------------------------------------|-------|-------|-------|
| 235542_at   | MGC22014: hypothetical protein MGC22014                                                    | -1.22 | -1.54 | -1.61 |
| 235556_at   | LOC153222: Adult retina protein                                                            | 1.01  | 1.64  | 2.13  |
| 235609_at   | Transcribed locus                                                                          | -1.09 | -2.02 | -1.76 |
| 235638_at   | RASSF6: Ras association (RalGDS/AF-6) domain family 6                                      | 1.49  | 1.52  | 2.04  |
| 235678_at   | GM2A: GM2 ganglioside activator                                                            | 1     | 1.63  | 1.59  |
| 235696_at   | CDNA clone IMAGE:4837650                                                                   | 1.13  | 1.58  | 1.67  |
| 235749_at   | UGCGL2: UDP-glucose ceramide glucosyltransferase-like 2                                    | -1.1  | -2.33 | -2.07 |
| 235764_at   | PRDM5: PR domain containing 5                                                              | -1.89 | -1.73 | -1.24 |
| 235803_at   | CRLF3: Cytokine receptor-like factor 3                                                     | -1.26 | -1.69 | -1.53 |
| 236140_at   | GCLM: glutamate-cysteine ligase, modifier subunit                                          | 2.89  | 1.47  | 1.57  |
| 236280_at   | Transcribed locus                                                                          | 1.79  | 2.29  | 2.41  |
| 236546_at   | POLA2: Polymerase (DNA directed), alpha 2 (70kD subunit)                                   | -1.32 | -1.68 | -1.99 |
| 236619_at   | Transcribed locus                                                                          | -1.11 | -2.39 | -1.53 |
| 236665_at   | CCDC18: coiled-coil domain containing 18                                                   | -1.36 | -2.6  | -1.58 |
| 236976_at   | FANCA: Fanconi anemia, complementation group A                                             | -1.11 | -1.73 | -2.08 |
| 237003_at   | VMD2L3: vitelliform macular dystrophy 2-like 3                                             | -1.46 | -1.55 | -1.87 |
| 237094_at   | FAM19A5: family with sequence similarity 19 (chemokine (C-C motif)-like), member A5        | -1.84 | -2.47 | -2.16 |
| 237322_at   | LOC150271: Hypothetical protein LOC150271                                                  | 1.4   | 1.68  | 1.79  |
| 237725_x_at | SMC5: structural maintenance of chromosomes 5                                              | 1.02  | -2.13 | -1.57 |
| 238015_at   | LOC201725: hypothetical protein LOC201725                                                  | -1.29 | -1.6  | -1.75 |
| 238117_at   | PPOX: protoporphyrinogen oxidase                                                           | -1.18 | 2.18  | 2.3   |
| 238476_at   | LOC153222: adult retina protein                                                            | 1.02  | 1.91  | 2.64  |
| 238681_at   | GDPD1: glycerophosphodiester phosphodiesterase domain containing 1                         | 1.55  | 2.93  | 2.91  |
| 238701_x_at | FLJ45803: FLJ45803 protein                                                                 | 1.85  | 1.67  | 1.99  |
| 238704_at   | Homo sapiens, clone IMAGE:3866695, mRNA                                                    | -1.09 | -1.8  | -1.77 |
| 238732_at   | COL24A1: collagen, type XXIV, alpha 1                                                      | 2.05  | 2.63  | 3.42  |
| 238977_at   | MCM6: MCM6 minichromosome maintenance deficient 6 (MIS5 homolog, S. pombe) (S. cerevisiae) | -1.33 | -2.66 | -2.16 |
| 239294_at   | Transcribed locus                                                                          | 1.17  | 2.06  | 2.14  |
| 239841_at   | C7orf24: Chromosome 7 open reading frame 24                                                | -1.09 | -1.59 | -1.53 |
| 239897_at   | BCLAF1: BCL2-associated transcription factor 1                                             | -1.35 | -2.5  | -1.6  |
| 240118_at   | TXNDC11: Thioredoxin domain containing 11                                                  | -1.44 | -2.08 | -1.94 |
| 240392_at   | CARD14: Caspase recruitment domain family, member 14                                       | 1.16  | 2.03  | 1.87  |
| 241360_at   | CCDC15: Coiled-coil domain containing 15                                                   | -1.23 | -1.97 | -1.68 |
| 241436_at   | SCNN1G: sodium channel, nonvoltage-gated 1, gamma                                          | -2.31 | -1.83 | -1.85 |
| 241569_at   | LOC146909: Hypothetical protein LOC146909                                                  | -1.33 | -1.8  | -1.91 |

|           |                                                                                                                                                                             |       |       |       |
|-----------|-----------------------------------------------------------------------------------------------------------------------------------------------------------------------------|-------|-------|-------|
| 242269_at | FLJ42875: FLJ42875 protein                                                                                                                                                  | 2.12  | 3.05  | 3.47  |
| 242890_at | HELLS: Helicase, lymphoid-specific                                                                                                                                          | -1.04 | -1.97 | -2.18 |
| 242918_at | NASP: Nuclear autoantigenic sperm protein (histone-binding)                                                                                                                 | -1.34 | -1.89 | -1.94 |
| 243465_at | TMEM140: Transmembrane protein 140                                                                                                                                          | 1.92  | 2.53  | 3.61  |
| 244071_at | LOC345630: similar to fibrillarin                                                                                                                                           | 2.21  | 2.34  | 2.52  |
| 244559_at | VPS52: Vacuolar protein sorting 52 ( <i>S. cerevisiae</i> )                                                                                                                 | 1.44  | 1.53  | 1.92  |
| 244623_at | gb:BF513800 /DB_XREF=gi:11598979 /DB_XREF=UI-H-BW1-amp-c-10-0-UI.s1 /CLONE=IMAGE:3070483 /FEA=EST /CNT=6 /TID=Hs.125304.0 /TIER=ConsEnd /STK=3 /UG=Hs.125304 /UG_TITLE=ESTs | -1.31 | -1.71 | -1.59 |
| 34726_at  | CACNB3: calcium channel, voltage-dependent, beta 3 subunit                                                                                                                  | 1.35  | 1.75  | 1.63  |
| 36711_at  | MAFF: v-maf musculoaponeurotic fibrosarcoma oncogene homolog F (avian)                                                                                                      | 1.03  | 1.72  | 1.7   |
| 49306_at  | RASSF4: Ras association (RalGDS/AF-6) domain family 4                                                                                                                       | -2.28 | -1.6  | -1.93 |
| 56256_at  | SIDT2: SID1 transmembrane family, member 2                                                                                                                                  | 1.02  | 1.66  | 1.6   |

\* Table contains probes determined by analysis through dChip to have a) fold change (up- or down-regulation) of >1.2; b) absolute increase or decrease in signal by >100; c) significant change in at least one of the 3 time points of the analysis; d) fold change (up- or down-regulation) of >1.5 in at least 2 of the time points of the analysis
